# Supplementary material for: Time Series Single-Cell Transcriptional Atlases Reveal Cell Fate Differentiation Driven by Light in Arabidopsis Seedlings
Source: Research Square preprint supplement (doi:10.21203/rs.3.rs-2152960/v1), 2022-10-28
Supplement: Supplementary file 1 [file 2ab2baadc826b054af7f786b.docx]

**Figure S1. Correlation Coefficient of RNA-Seq Data**. SC: single cell RNA-seq data; SC_RootWT1, SC_RootWT2 and SC_Rootshr (Denyer et al., 2019); SC_Root (Zhang et al., 2019); SC_Cotyledon (Liu et al., 2020); RU and RP: bulk RNA-seq data for root (Denyer et al., 2019); D2L and Dark: bulk RNA-Seq data for hypocotyl and cotyledon during de-etiolation (Burko et al., 202). Color: correlation coefficient with whole genome expression levels.


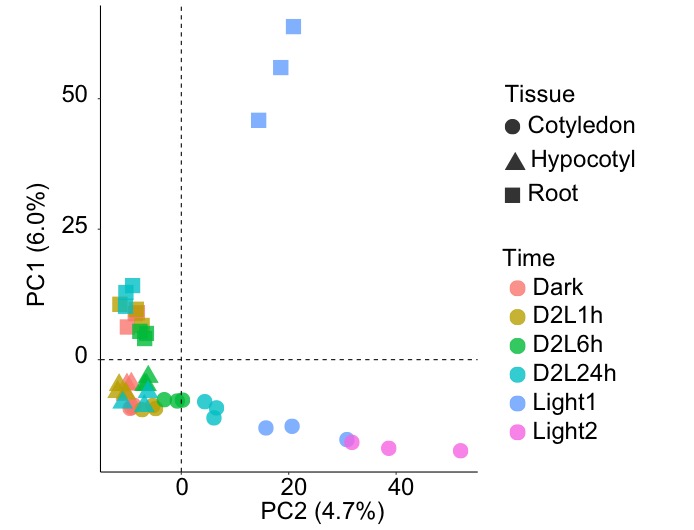


**Figure S2. The Principal Component Analysis of Bulk RNA-Seq for Three Organs during De-Etiolation.** Shape: different organs; Color: different sampling time points.


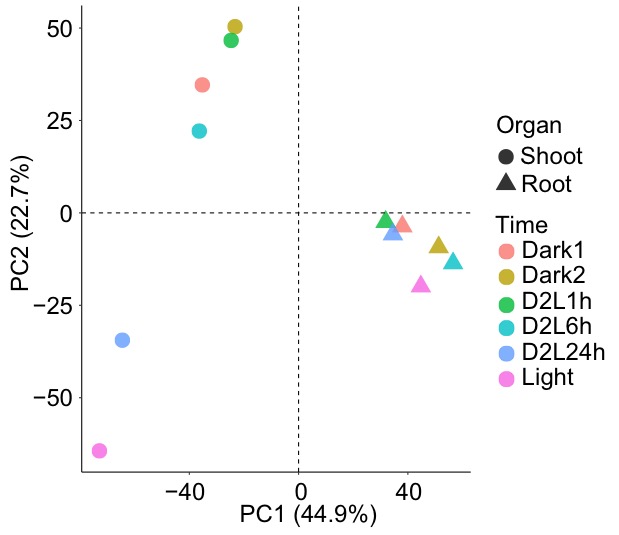


**Figure S3**. **The Principal Component Analysis of Single Cell RNA-Seq during De-Etiolation.** Shape: different parts; Color: different sampling time points.


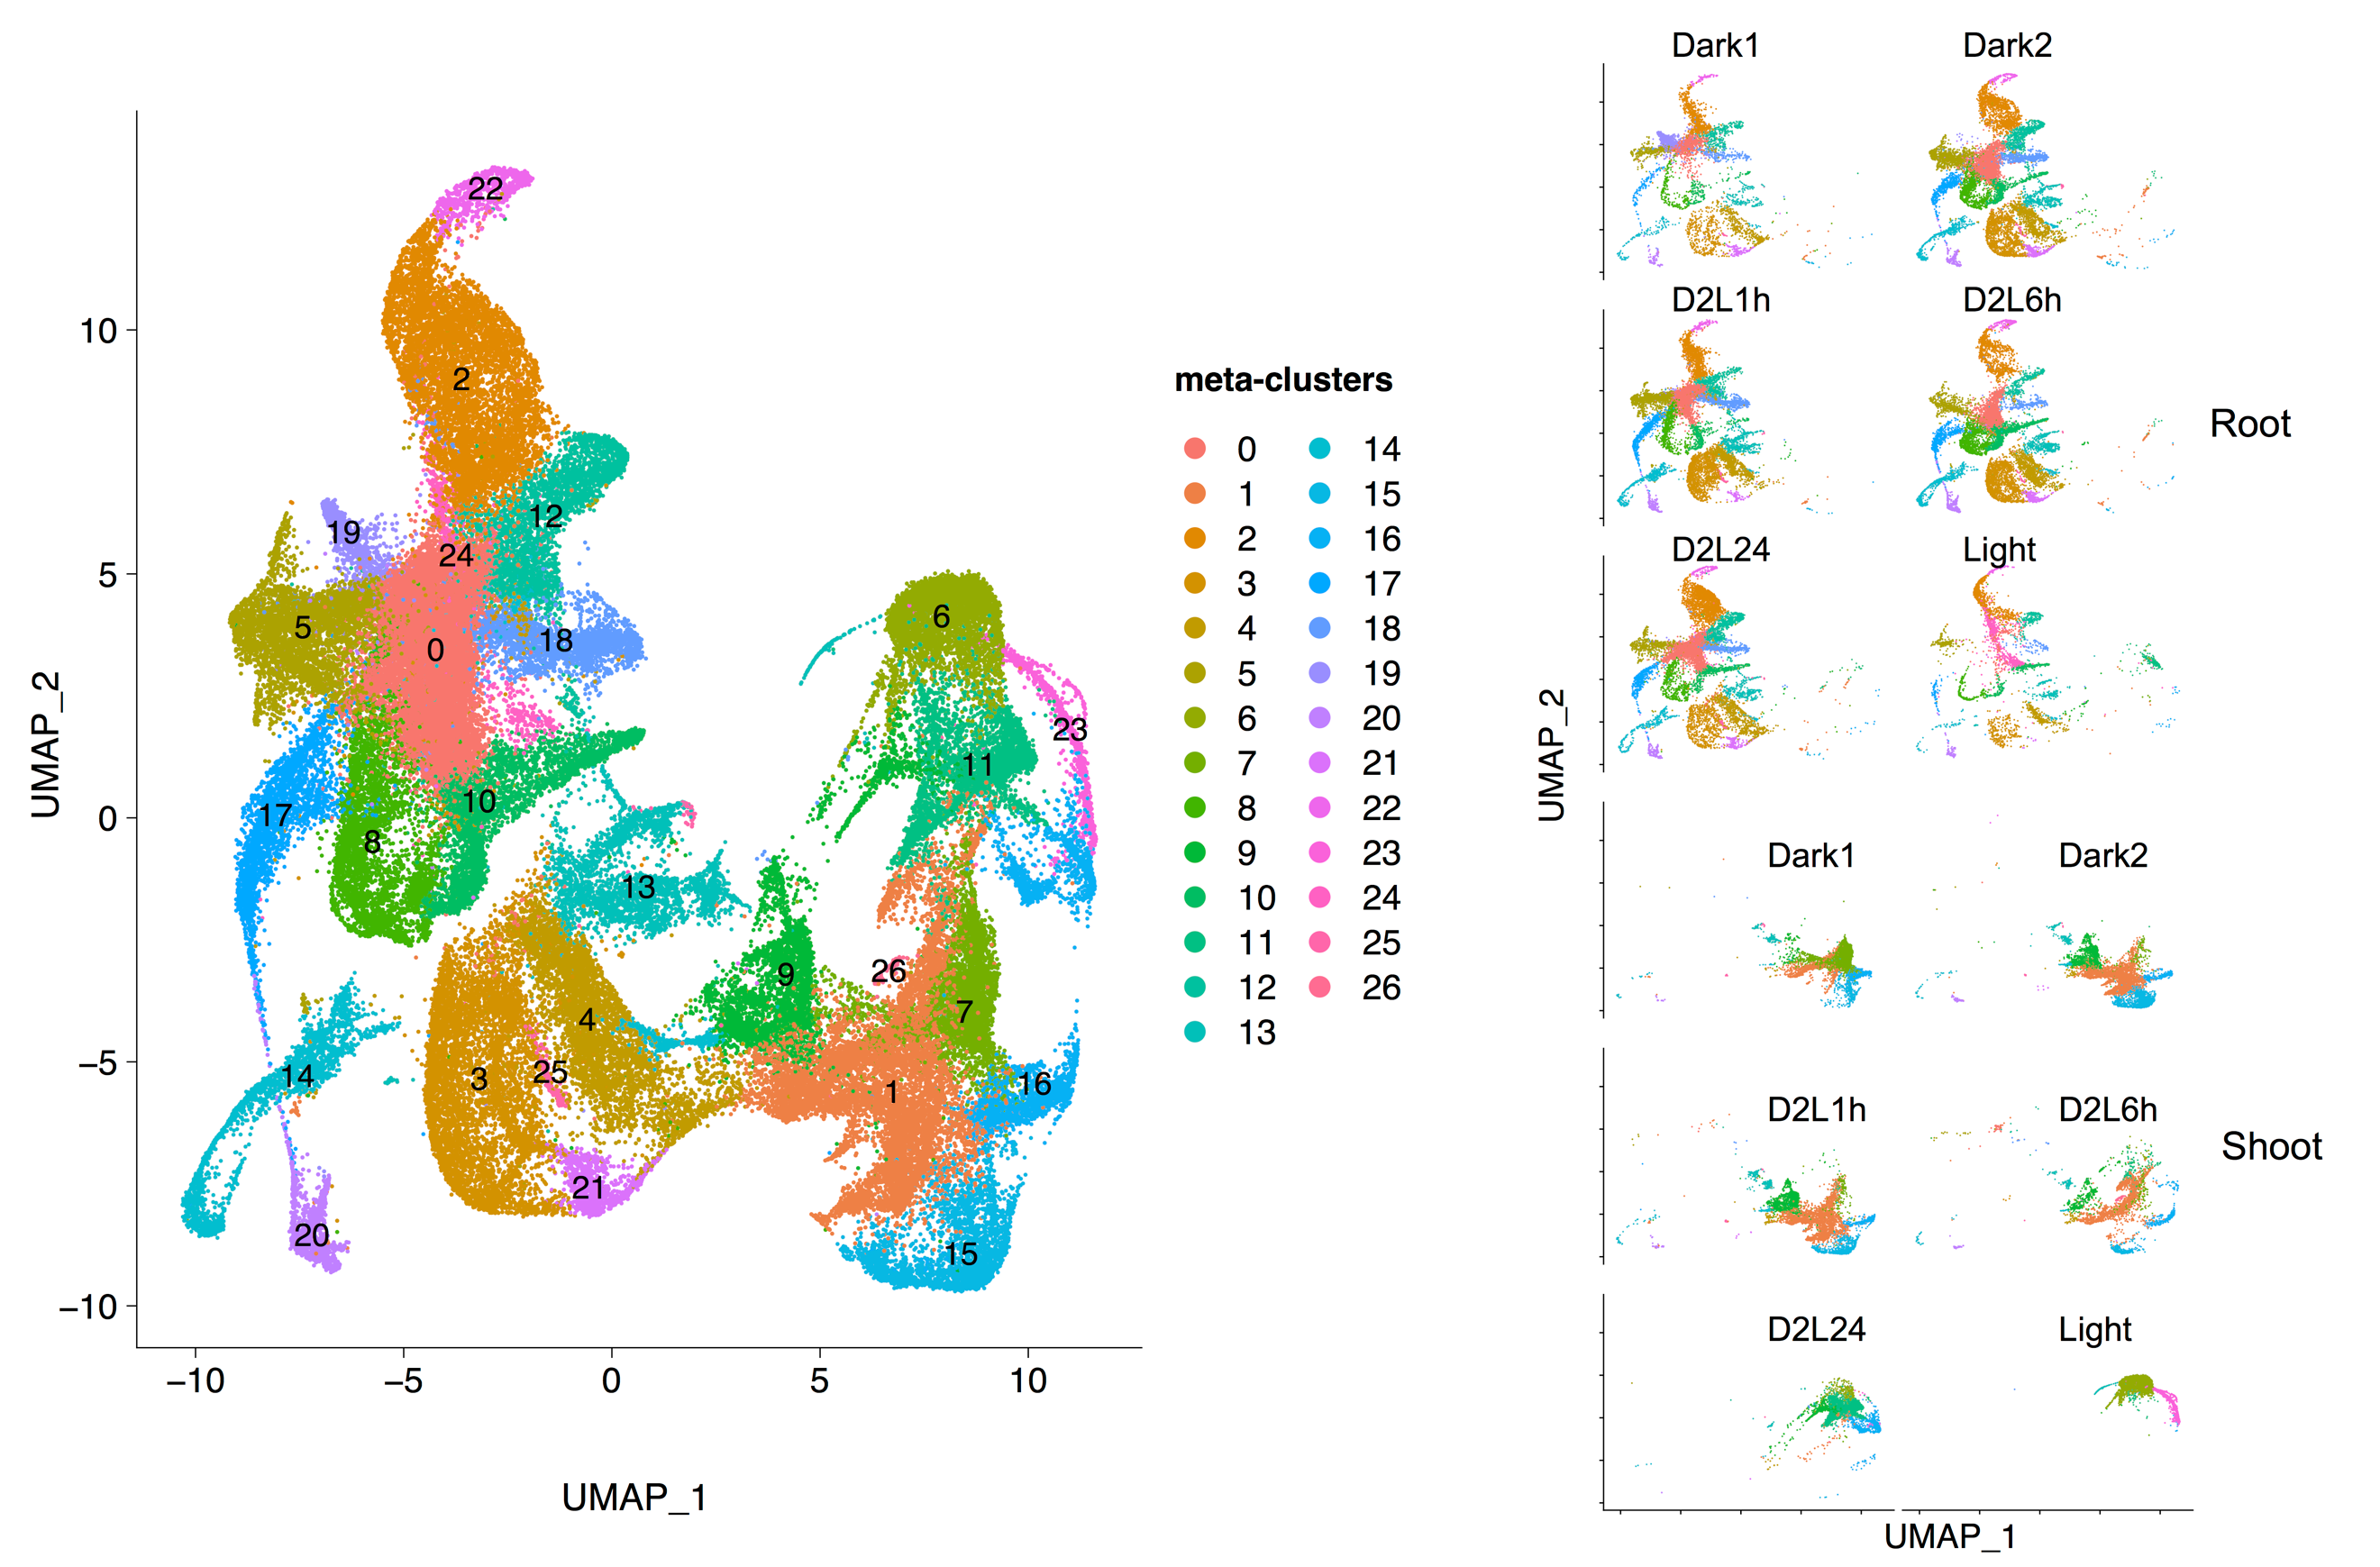


**Figure S4. Visualization of Seedling Cells Using UMAP.** Dot indicated individual cells while color represented respective cell types. Cells have been split by different samples in the right part.


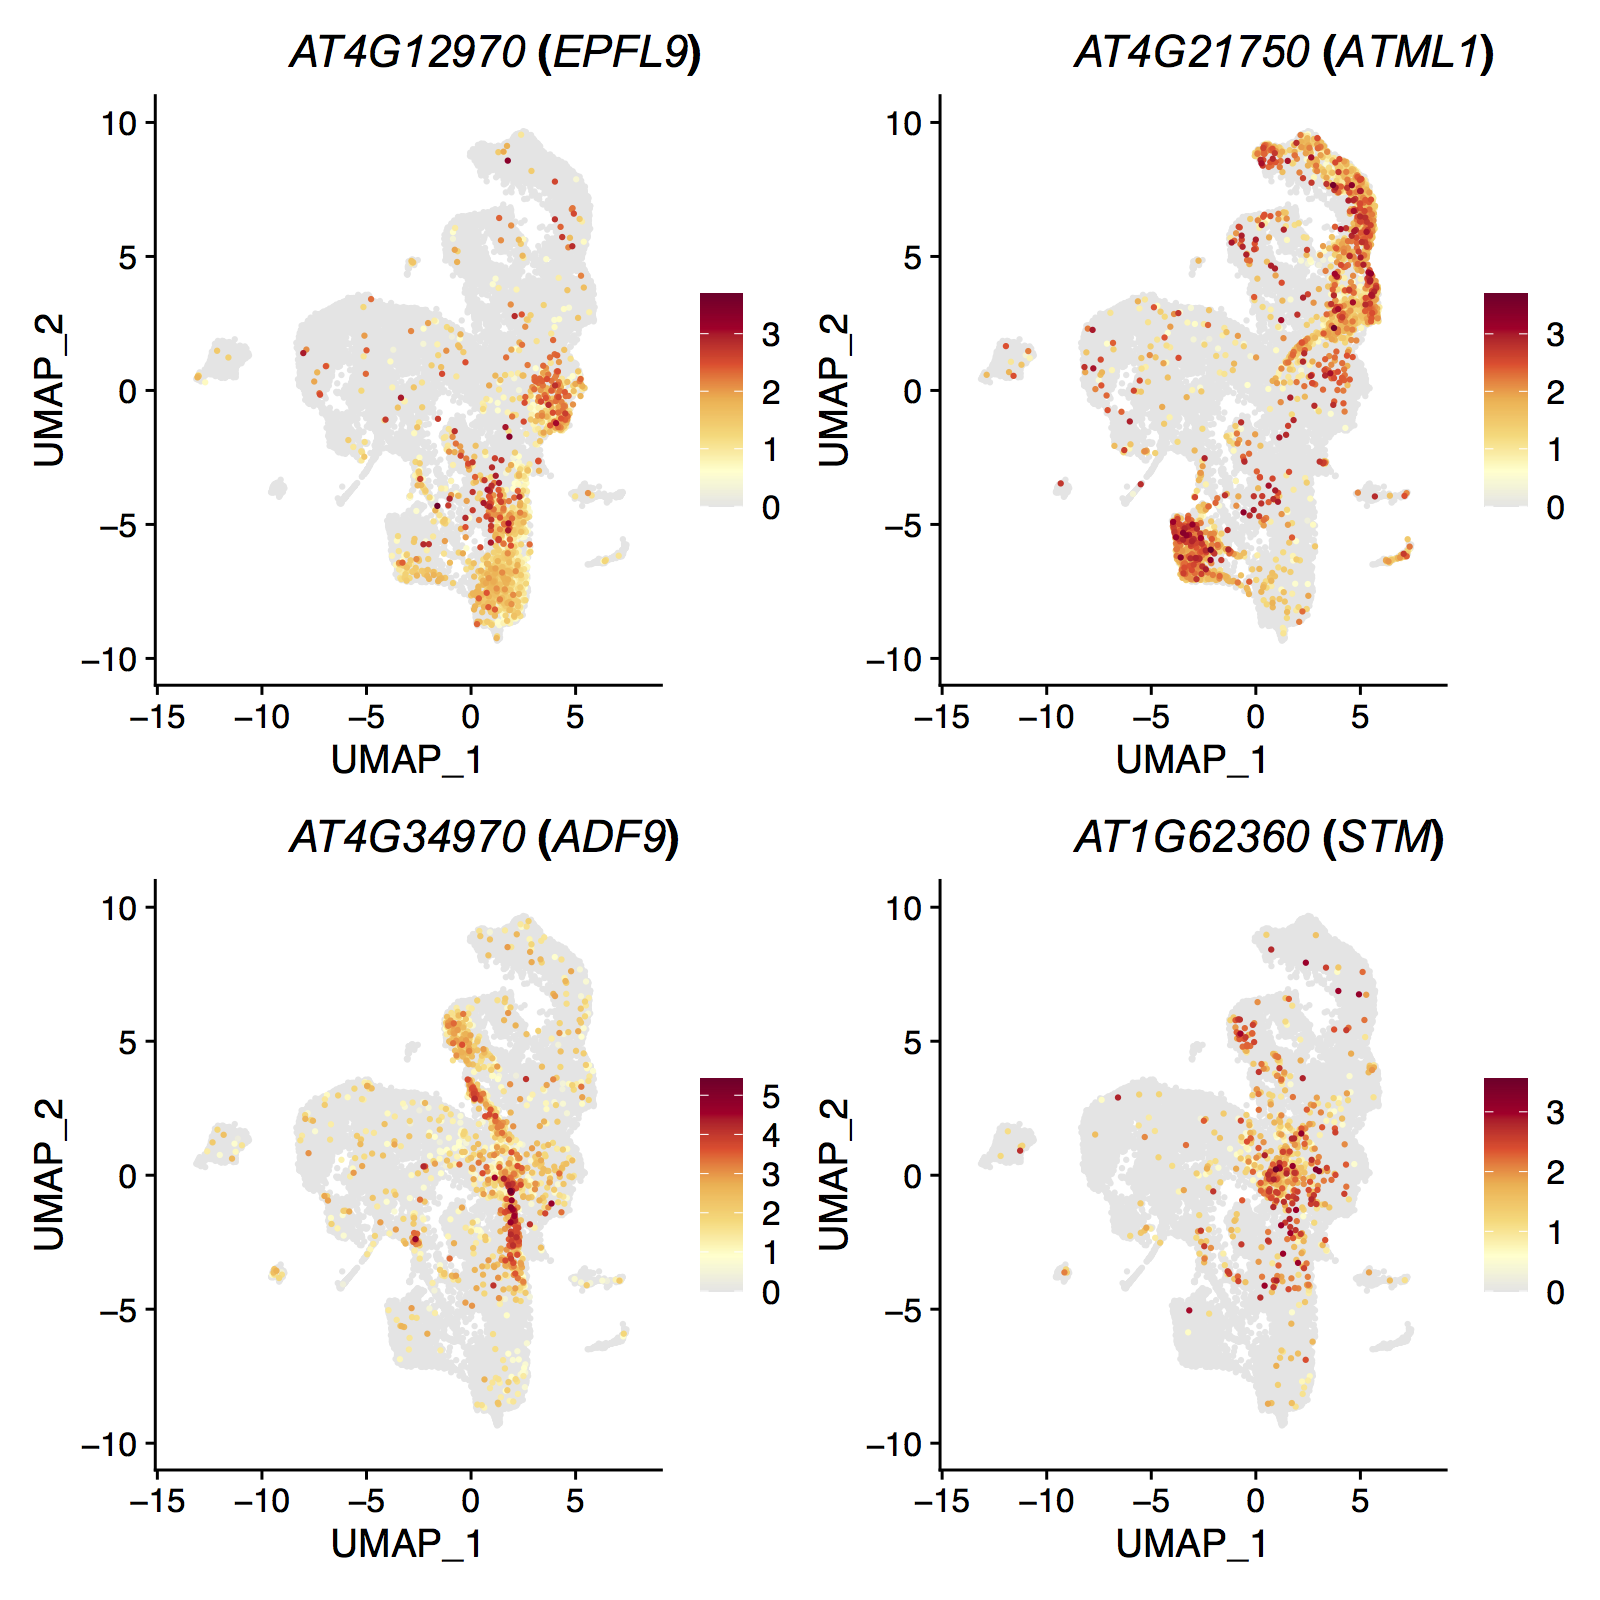


**Figure S5. Expression Patterns of Shoot Cell Markers for Mesophyll, Epidermis, Endodermis and SAM cells.** Color: Normalized UMI counts.


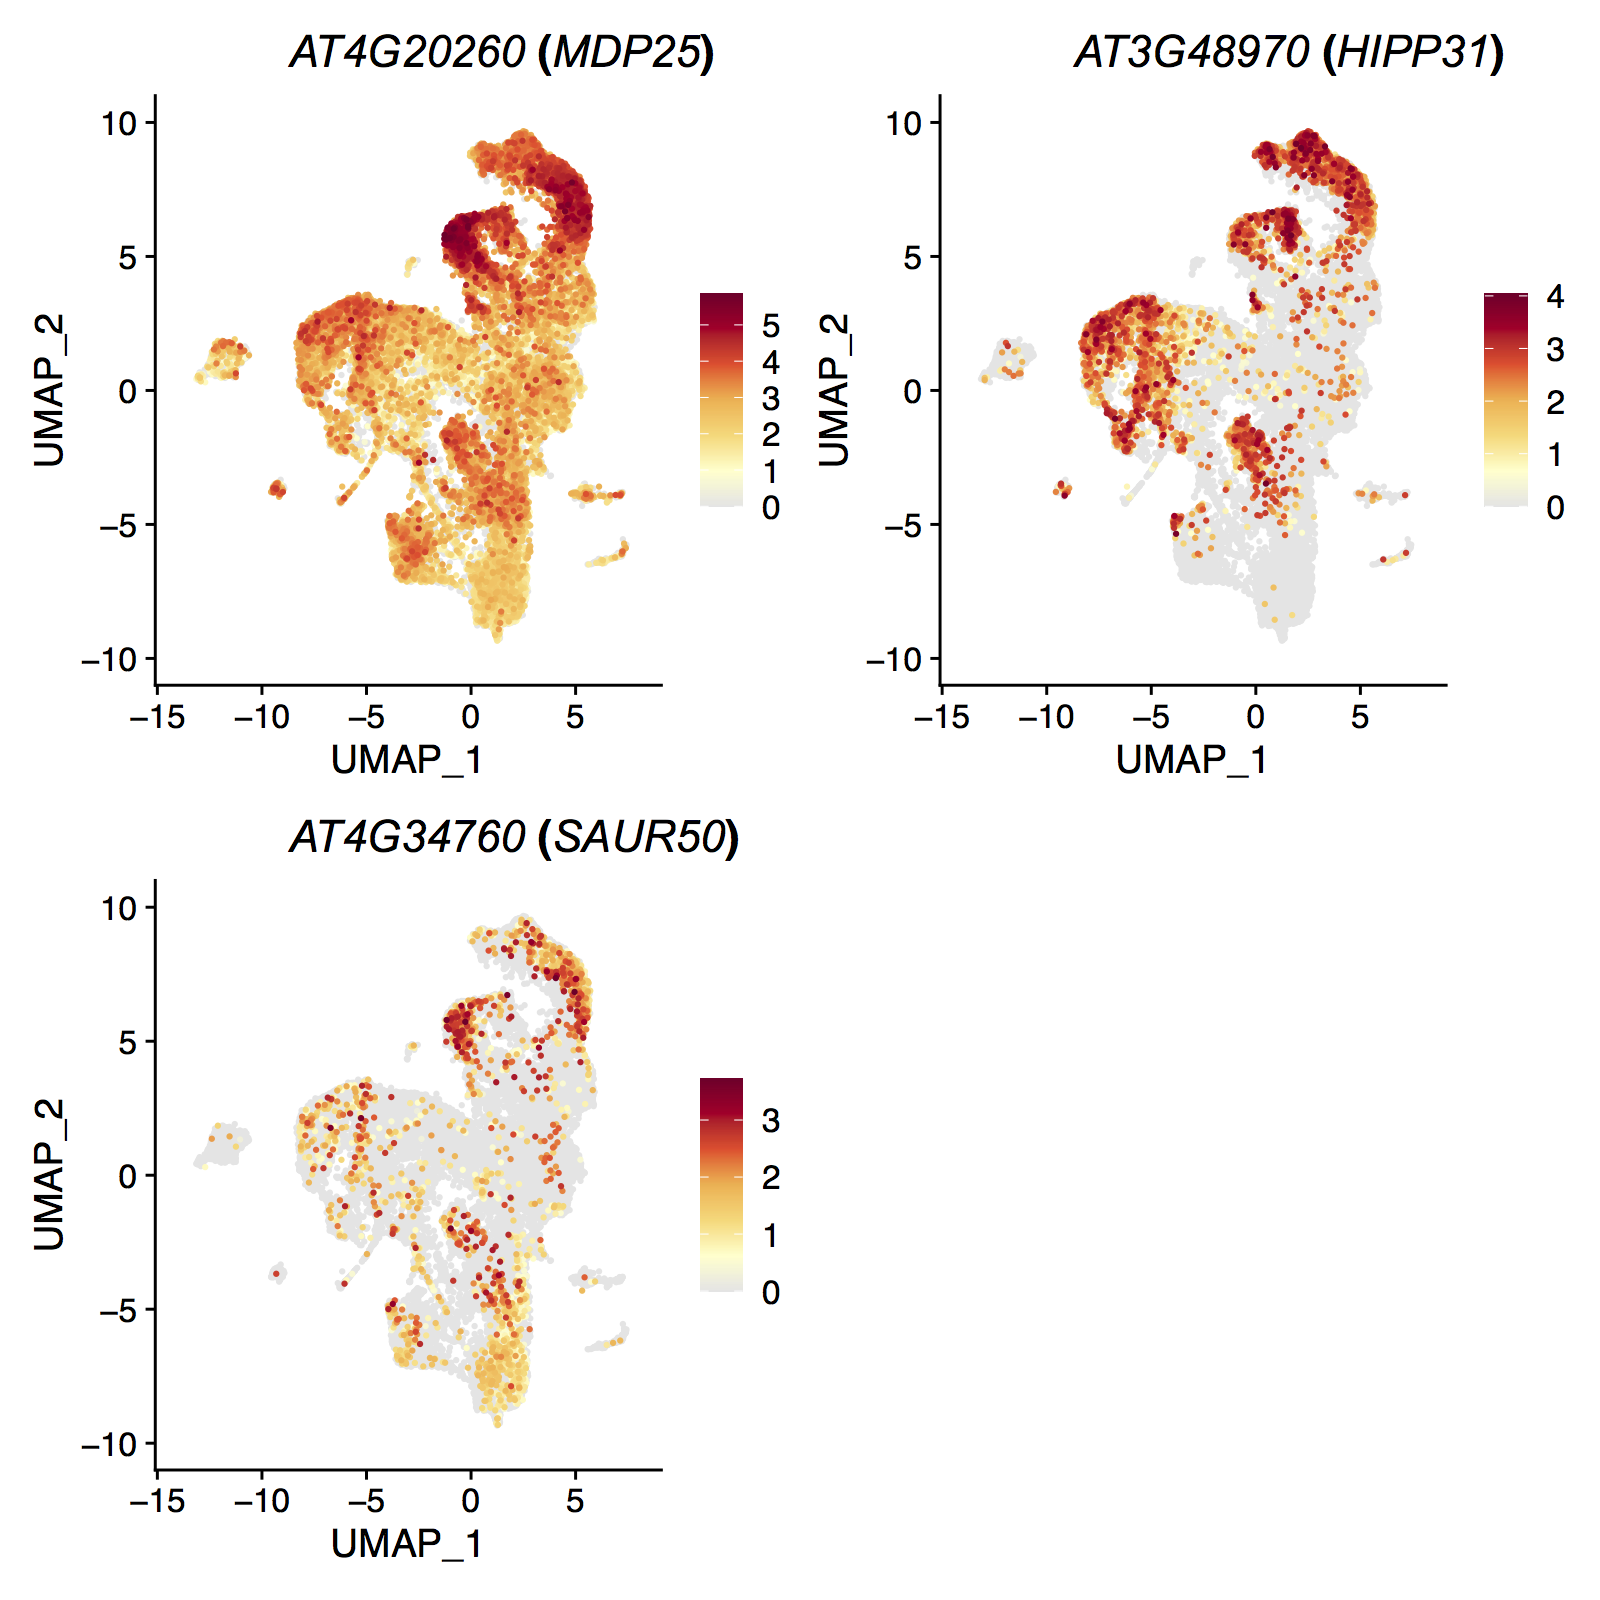


**Figure S6. Expression Patterns of Hypocotyl Markers in Shoot Atlas.** Color: Normalized UMI counts.


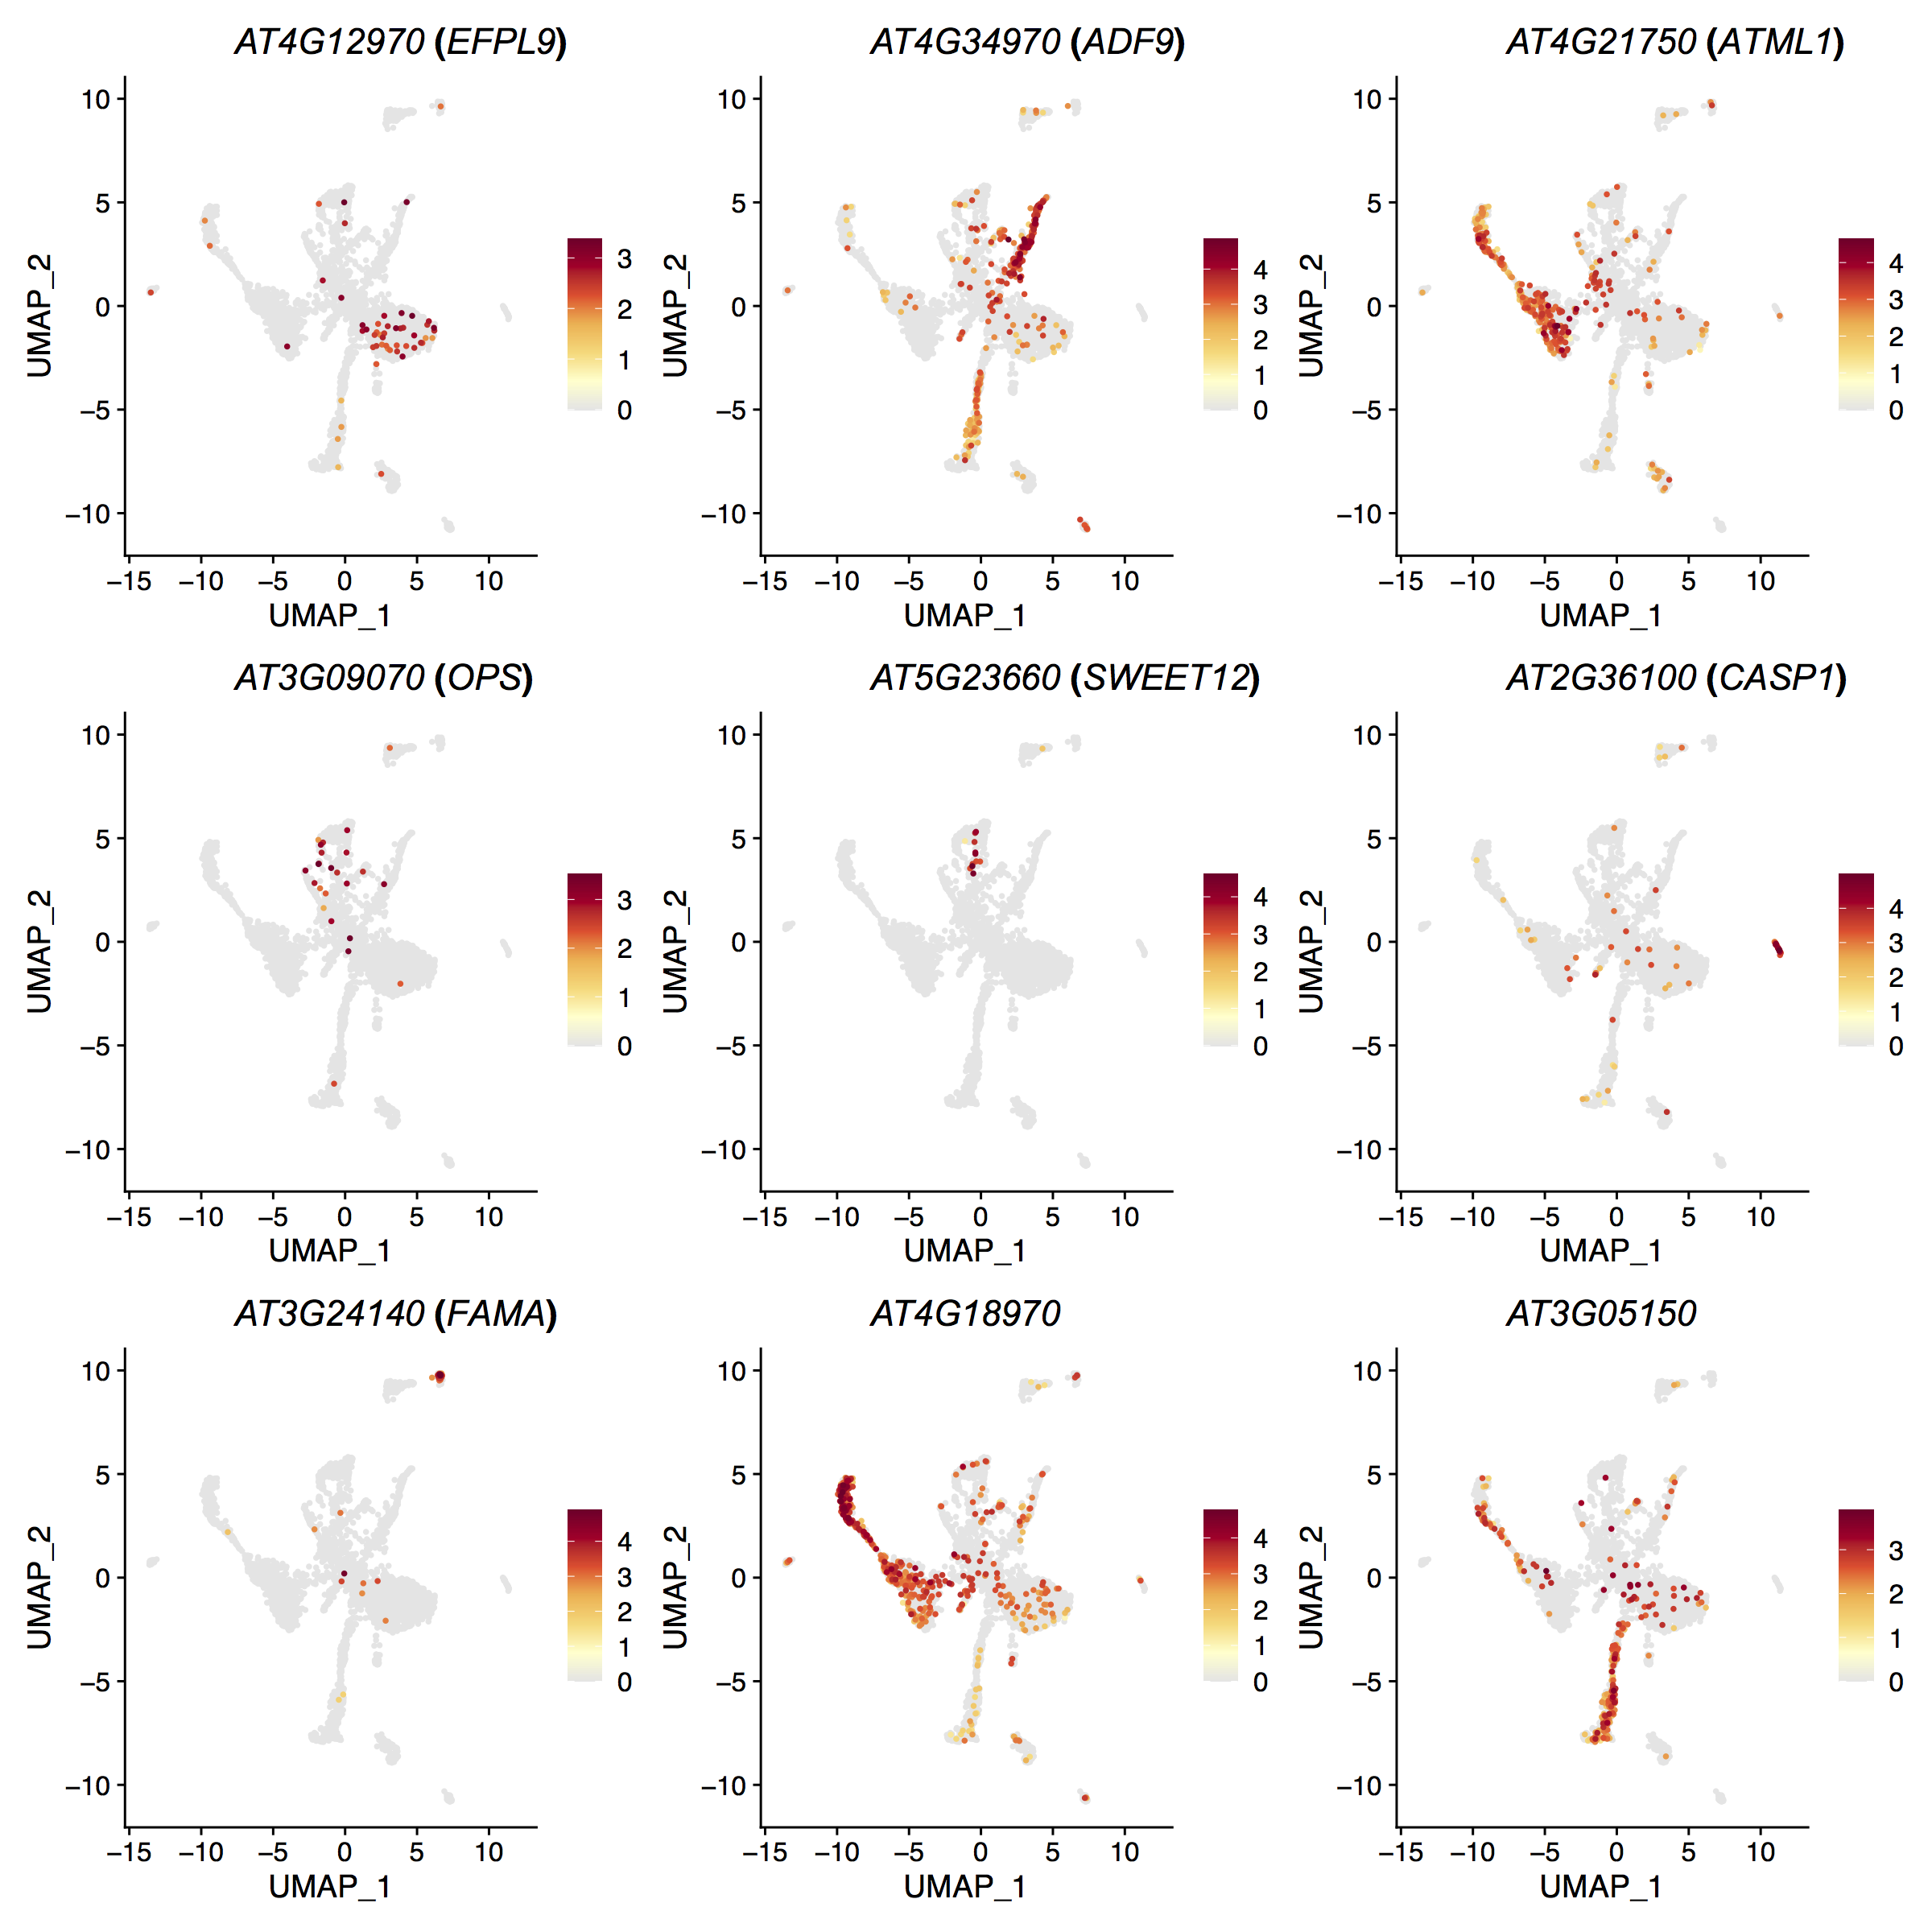


**Figure S7. Expression Patterns of Shoot Cell Markers in Single Nucleus Atlas.** Color: Normalized UMI counts.

**Figure S8. Cell Identity Corresponding Relations before and after Batch Effect Correction.** Color: scaled ( cell content).


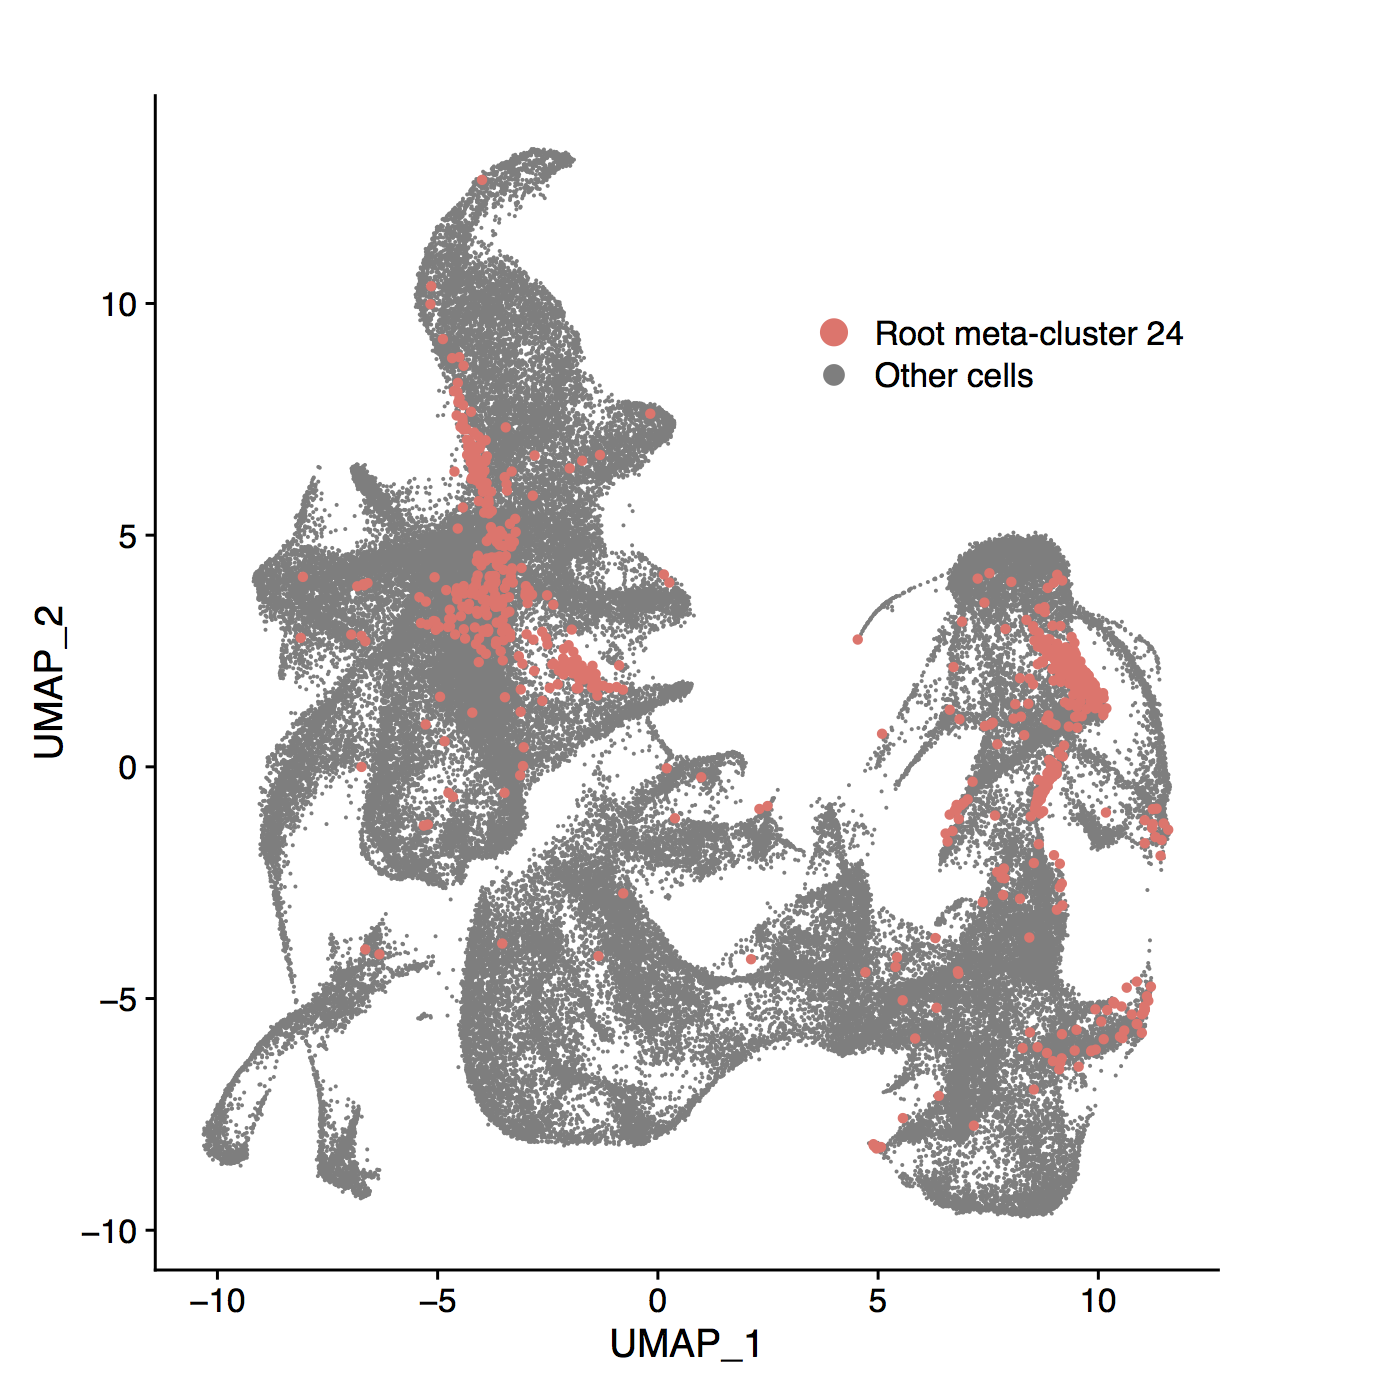


**Figure S9. Distribution of Root Cluster 24 in the Seedling Atlas.** Cells of root cluster 24 have been highlighted in pink.


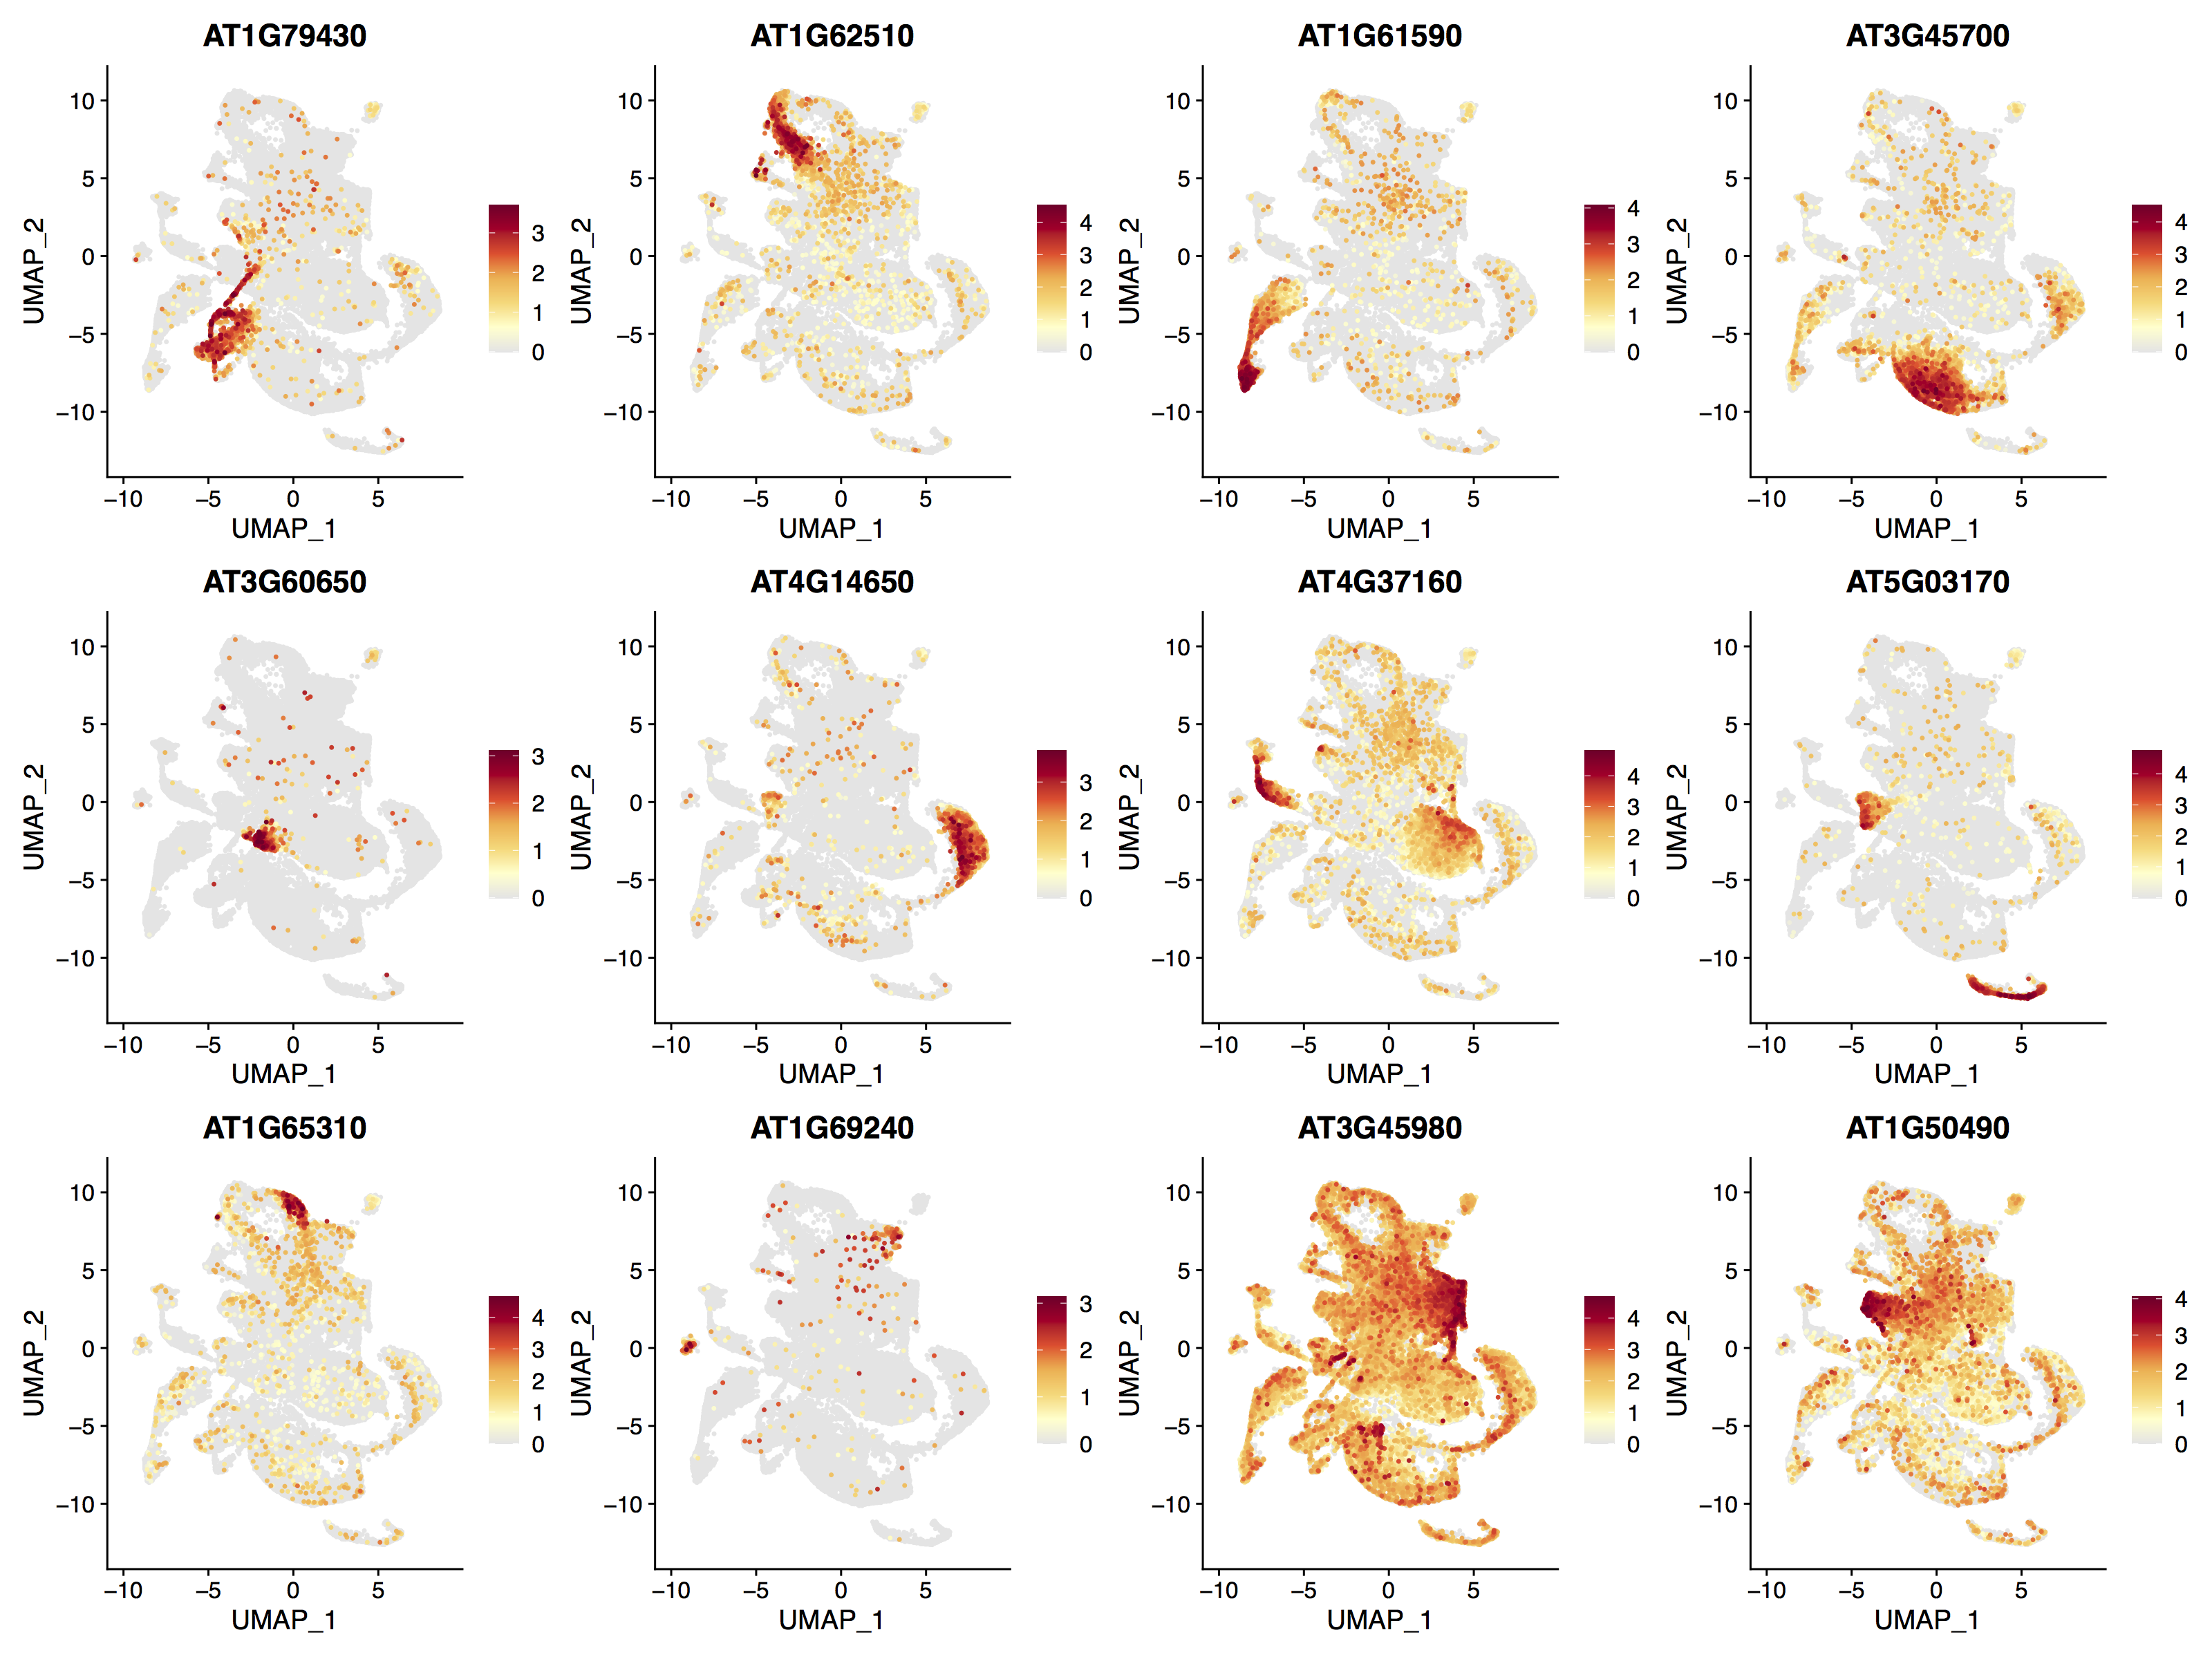


**Figure S10.** **Expression Patterns of Root Cell Markers.** Color: Normalized UMI counts.

**Figure S11. Spatiotemporal Expression Patterns of Gravitropism Genes during De-Etiolation.**

**Figure S12.** **Distribution of Spatiotemporally Specific Genes Involved in Hormone Biosynthesis (Upper) and Signaling (Lower) in Root.** Left: Absolute value; Right: Relative value.

**Figure S13.** **Spatiotemporal Expression Patterns of *SAUR* genes during De-Etiolation.**


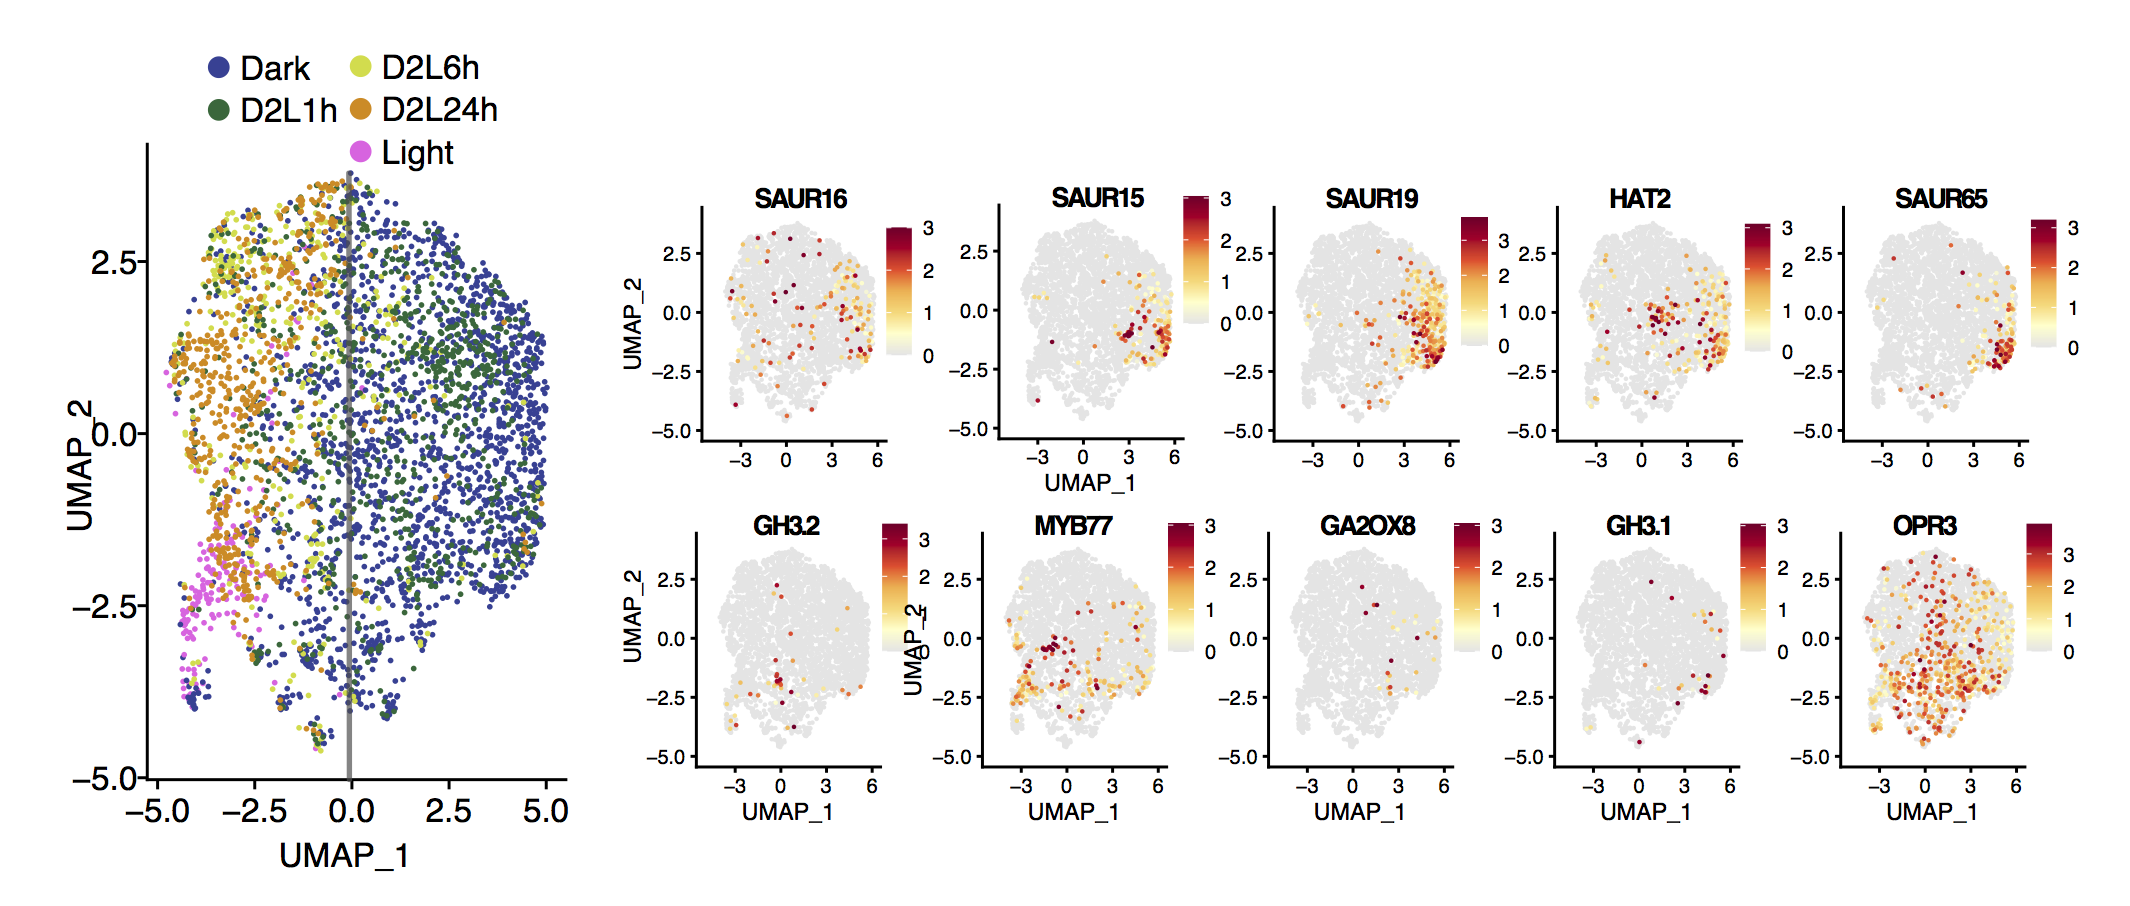


**Figure S14. Asymmetric Distribution of Auxin Responsive Genes in Hypocotyl Epidermis Cells.** Left: Visualization of hypocotyl epidermal cells using UMAP. Colors indicates different de-etiolation times. Right: Expression pattern of population specific genes in identified in cortex cells.

**Figure S15 Enriched GO Terms of Dynamic Genes in Cortex during De-Etiolation.** Color: significant level; Size: fold enrichment


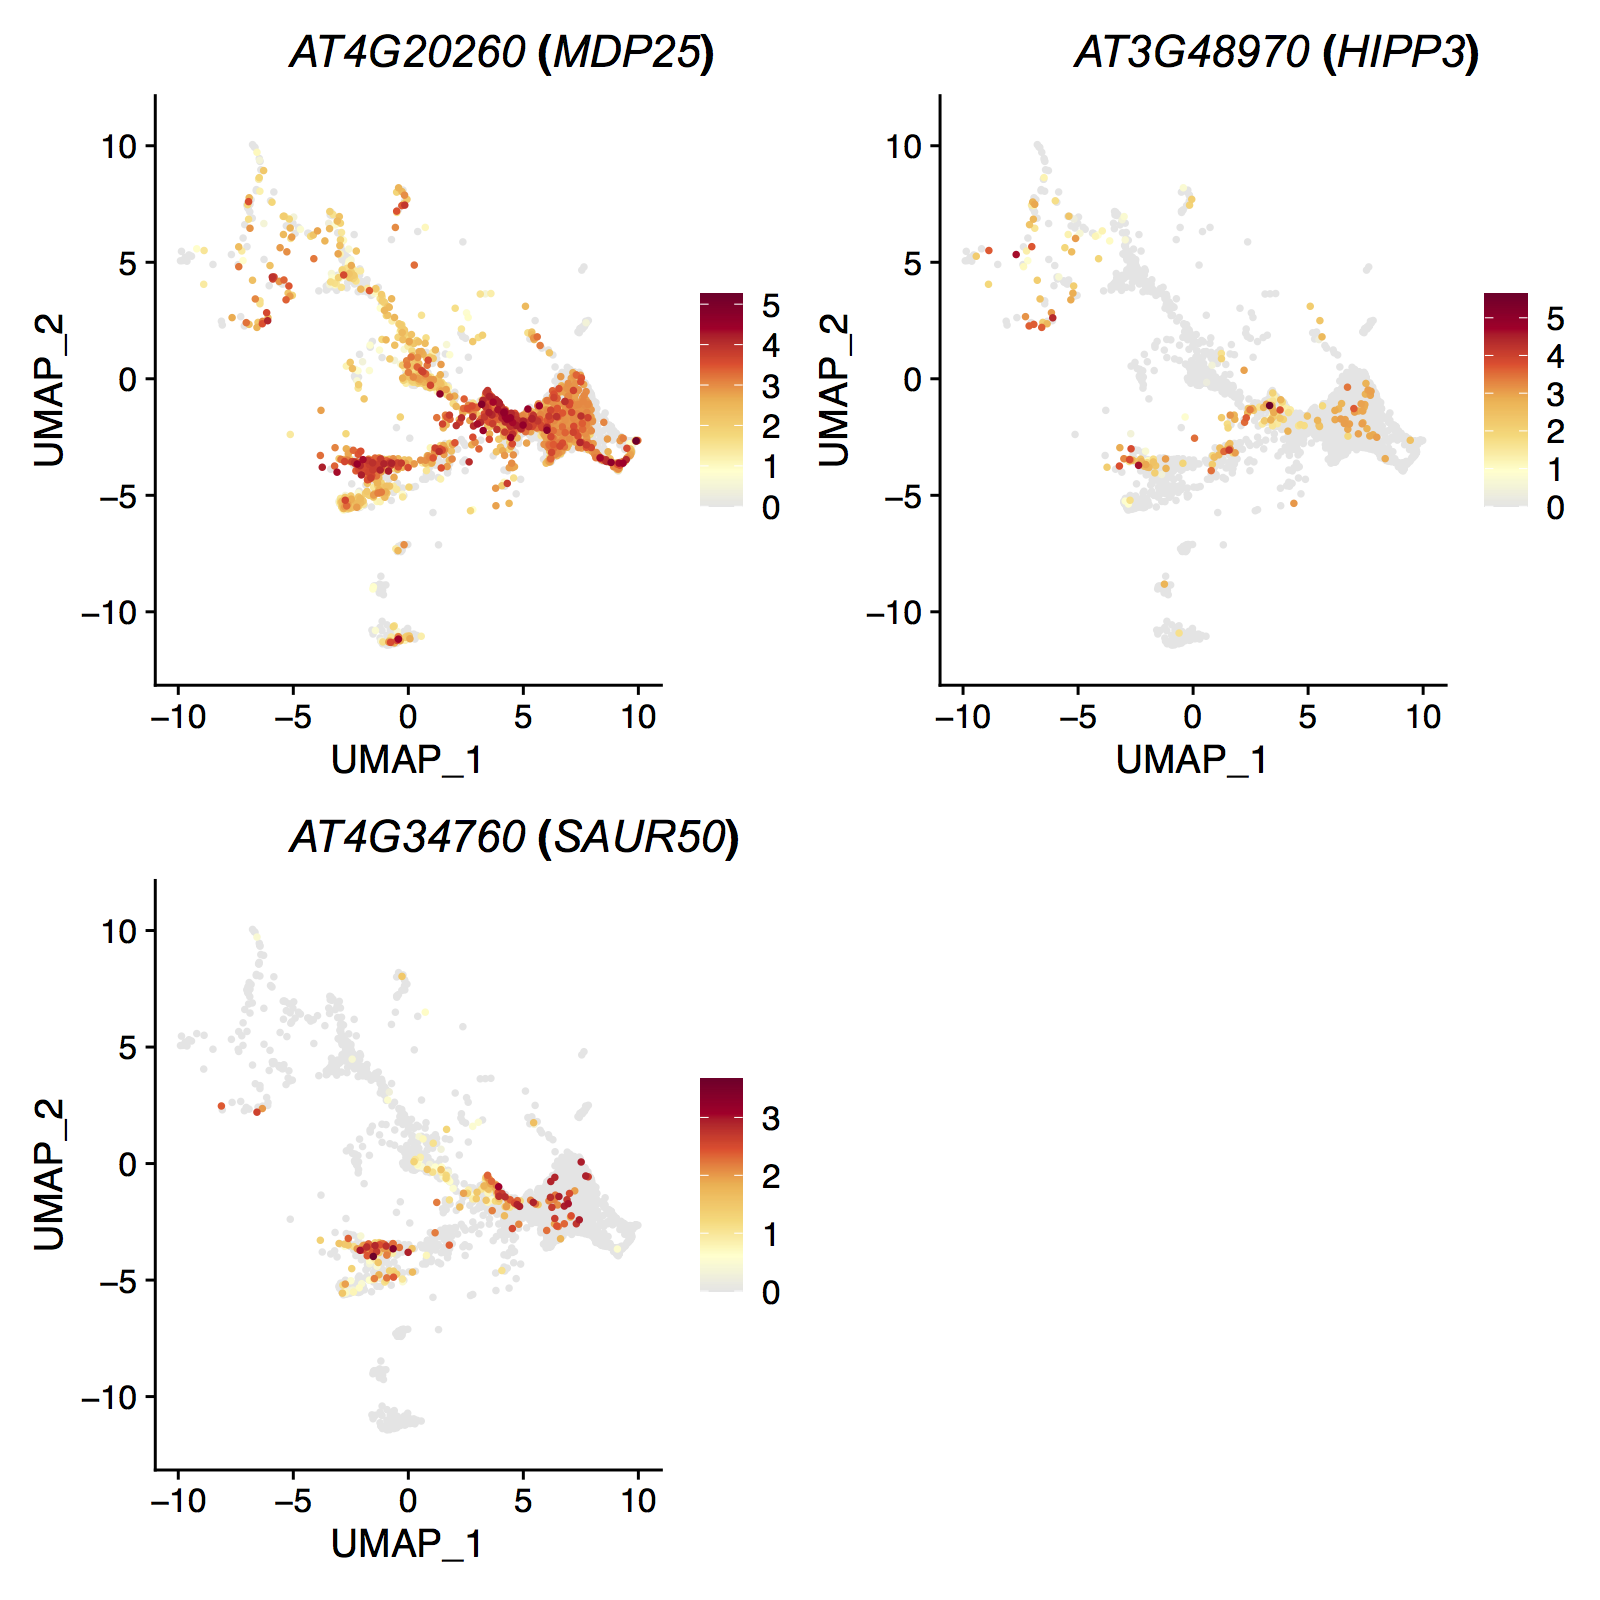


**Figure S16.** **Expression Patterns of Hypocotyl Markers in *pifq* Shoot Atlas.** Color: Normalized UMI counts.


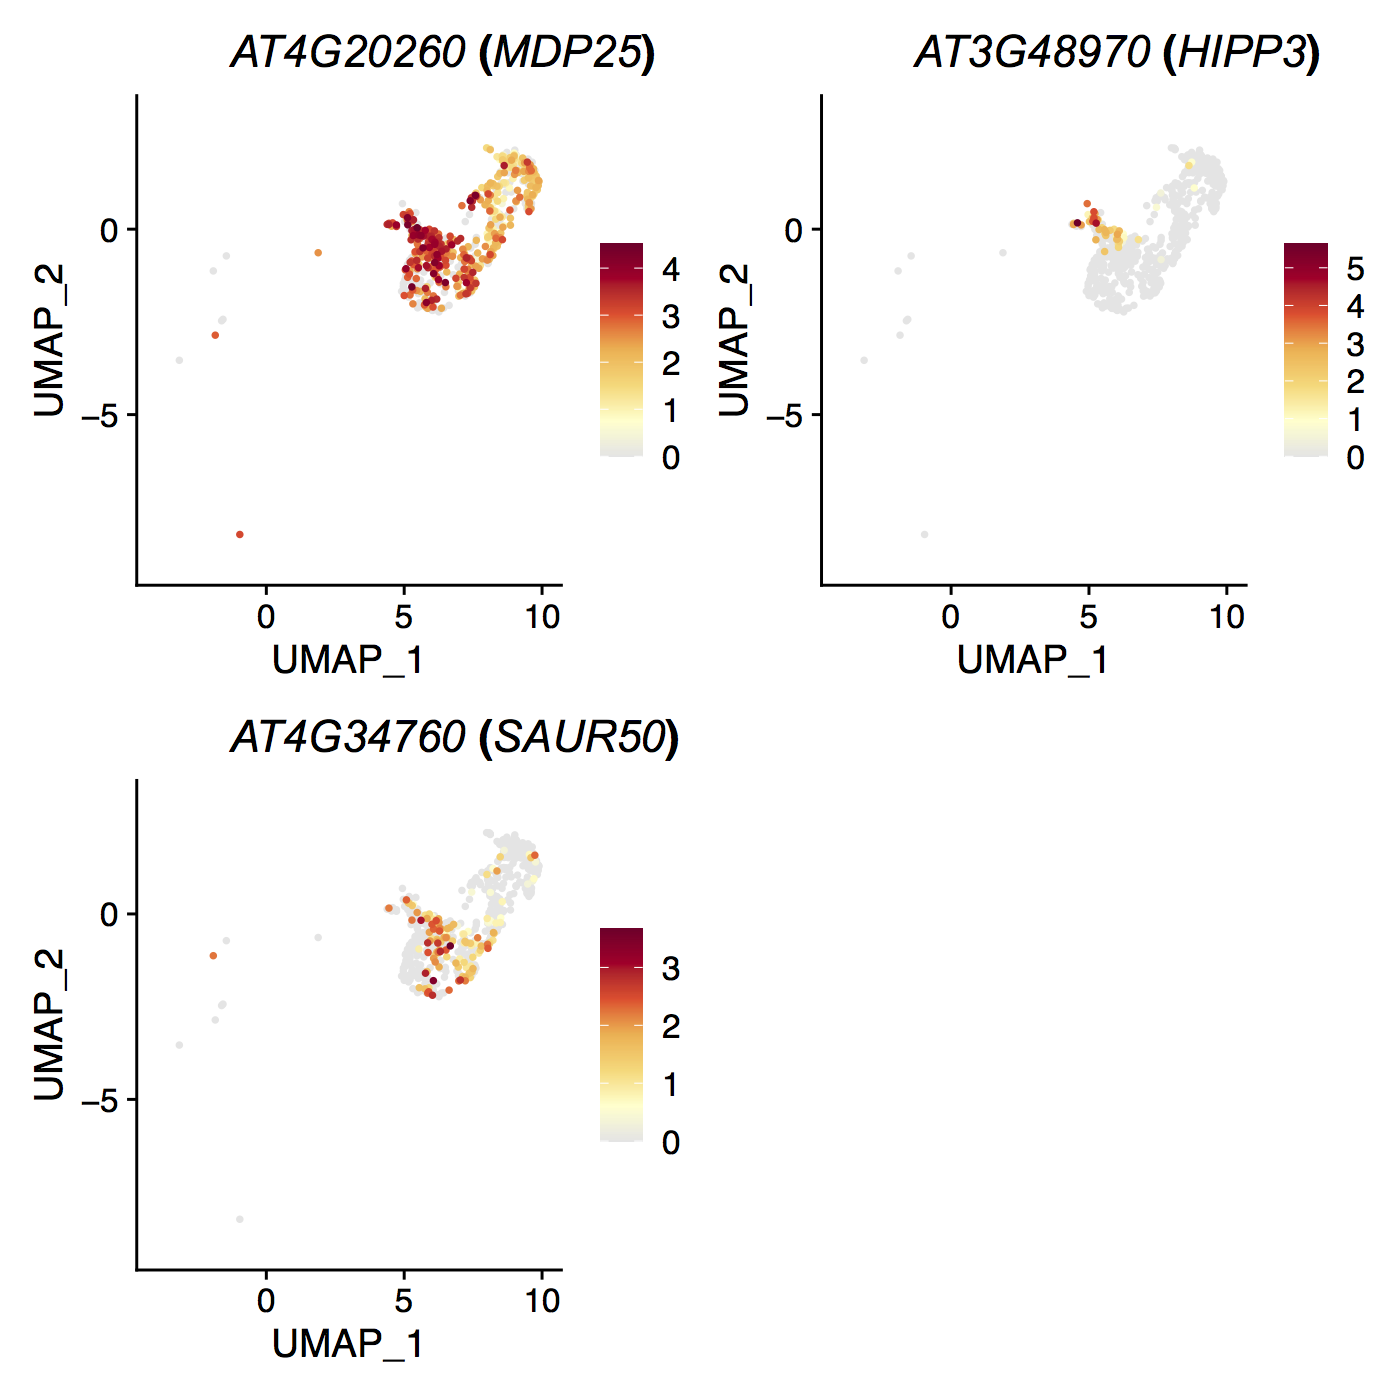


**Figure S17. Expression Patterns of Hypocotyl Markers in *pifq* Epidermis Atlas.** Color: Normalized UMI counts.


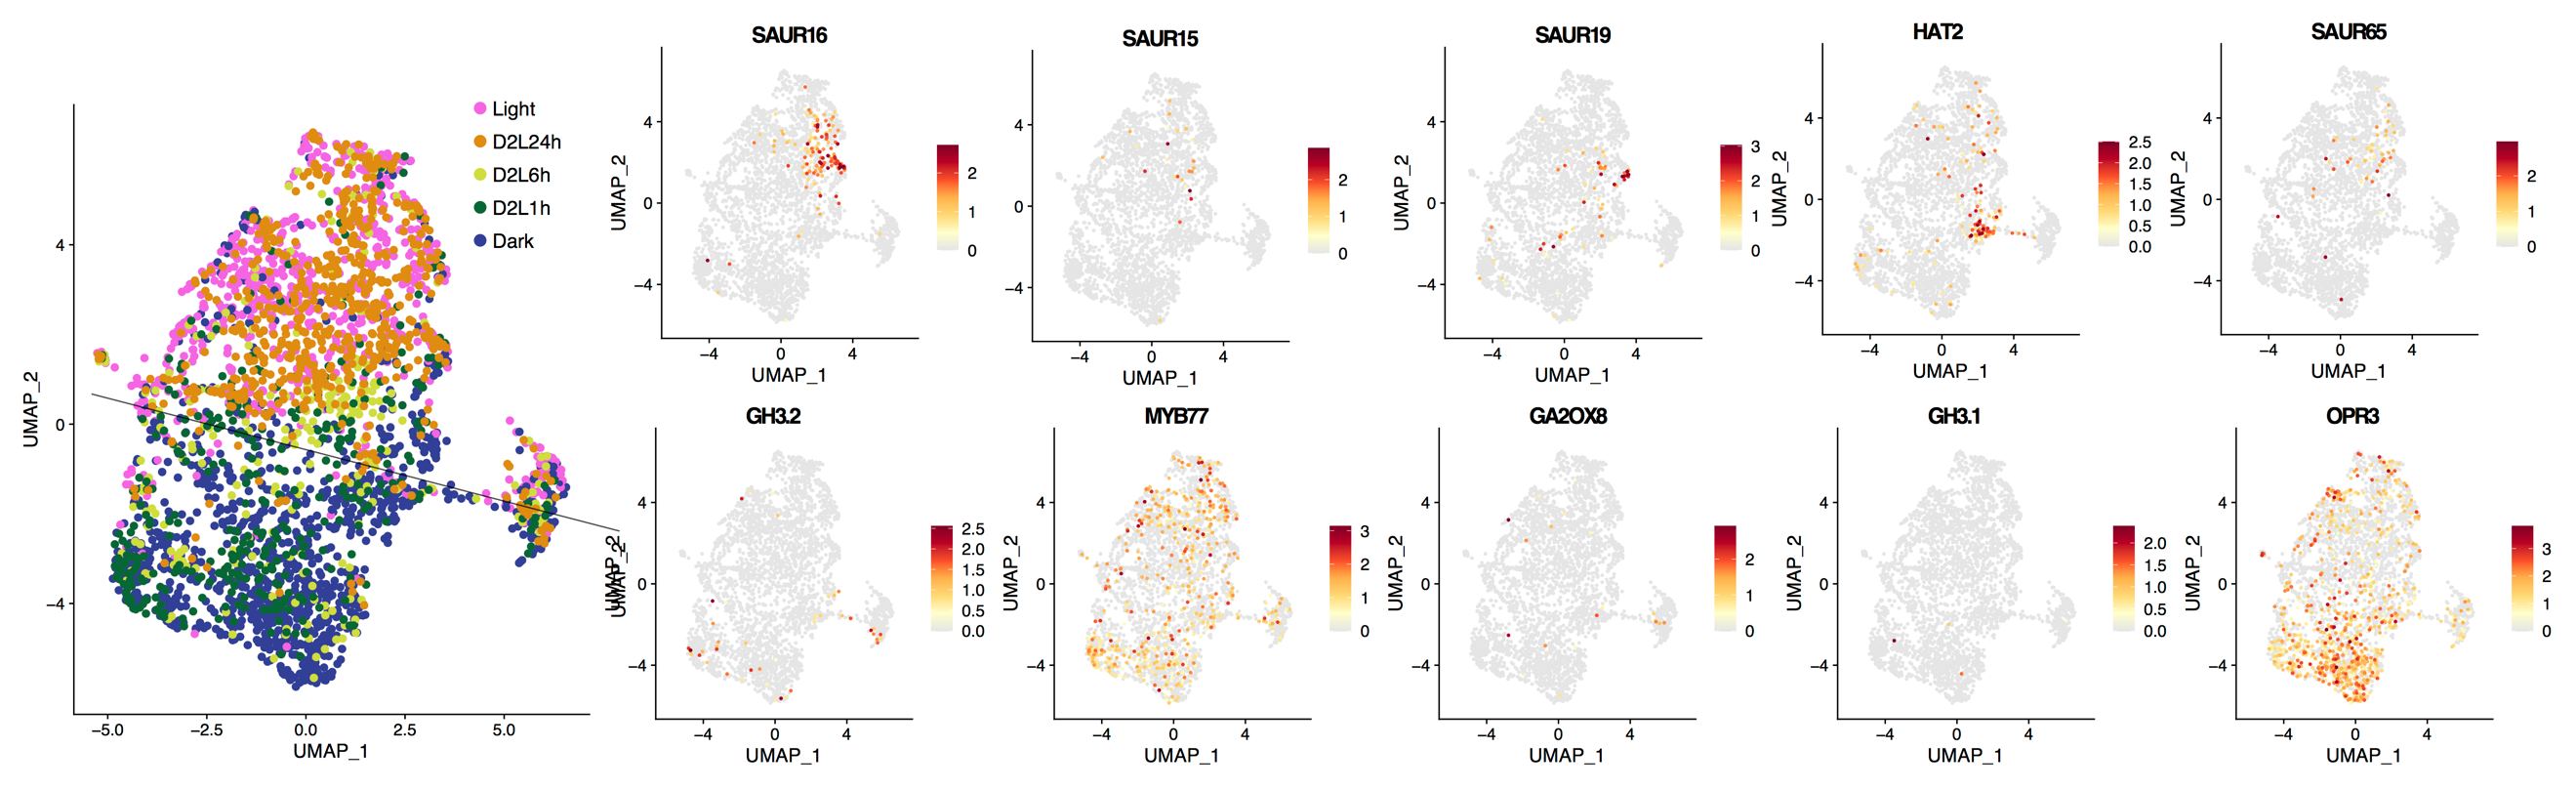


**Figure S18. Distribution of Auxin Responsive Genes in Cotyledon Epidermis Cells.** Left: Visualization of cotyledon epidermal cells using UMAP. Colors indicates different de-etiolation times. Right: Expression pattern of population specific genes in identified in cortex cells.

**Figure S19. Expression of *bHLH167* in Epidermis for Seedlings Grown in Constant Dark and Constant Light for 5 Days.** The gene expression pattern of *bHLH167* and *FAMA* was revealed by promoter Histone2B-YFP (H2B-YFP, yellow) and CFP-FAMA (blue) reporter. Scale bar: 20 μm.


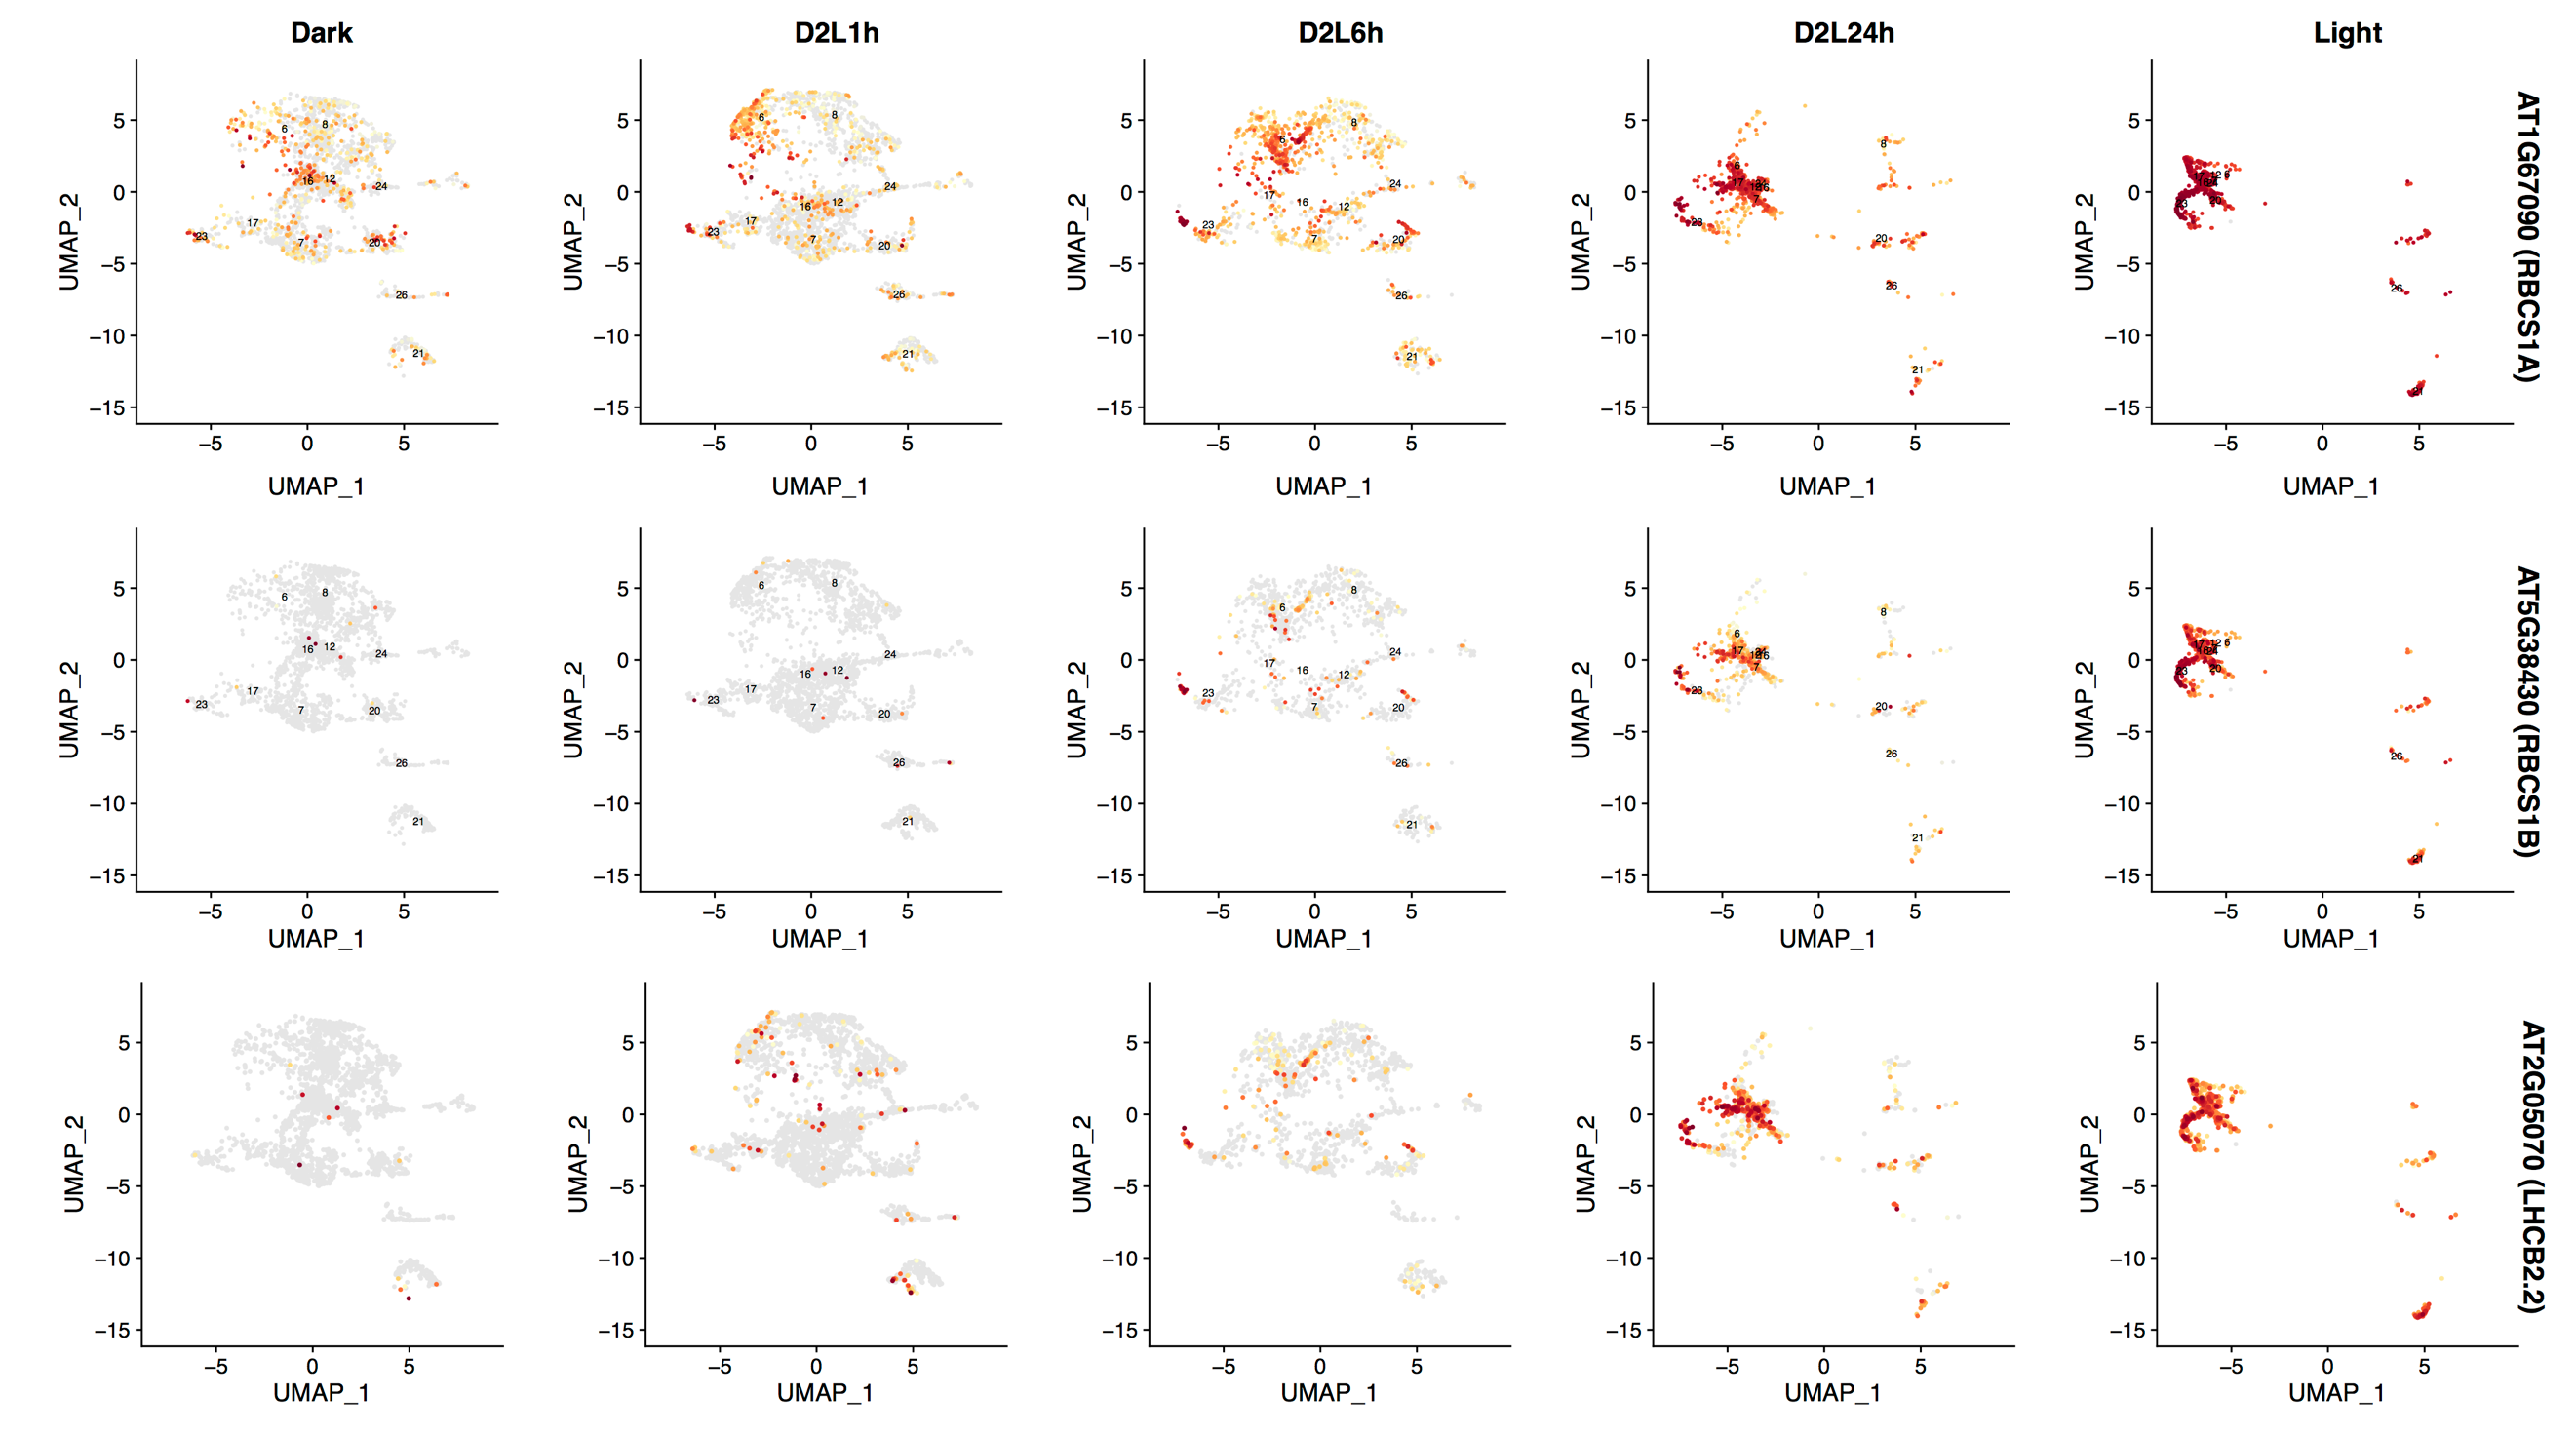


**Figure S20. Time-Series Expression Distribution of RBCS and LHCB Genes during De-Etiolation in Vascular Cells.** Color: Normalized UMI counts.


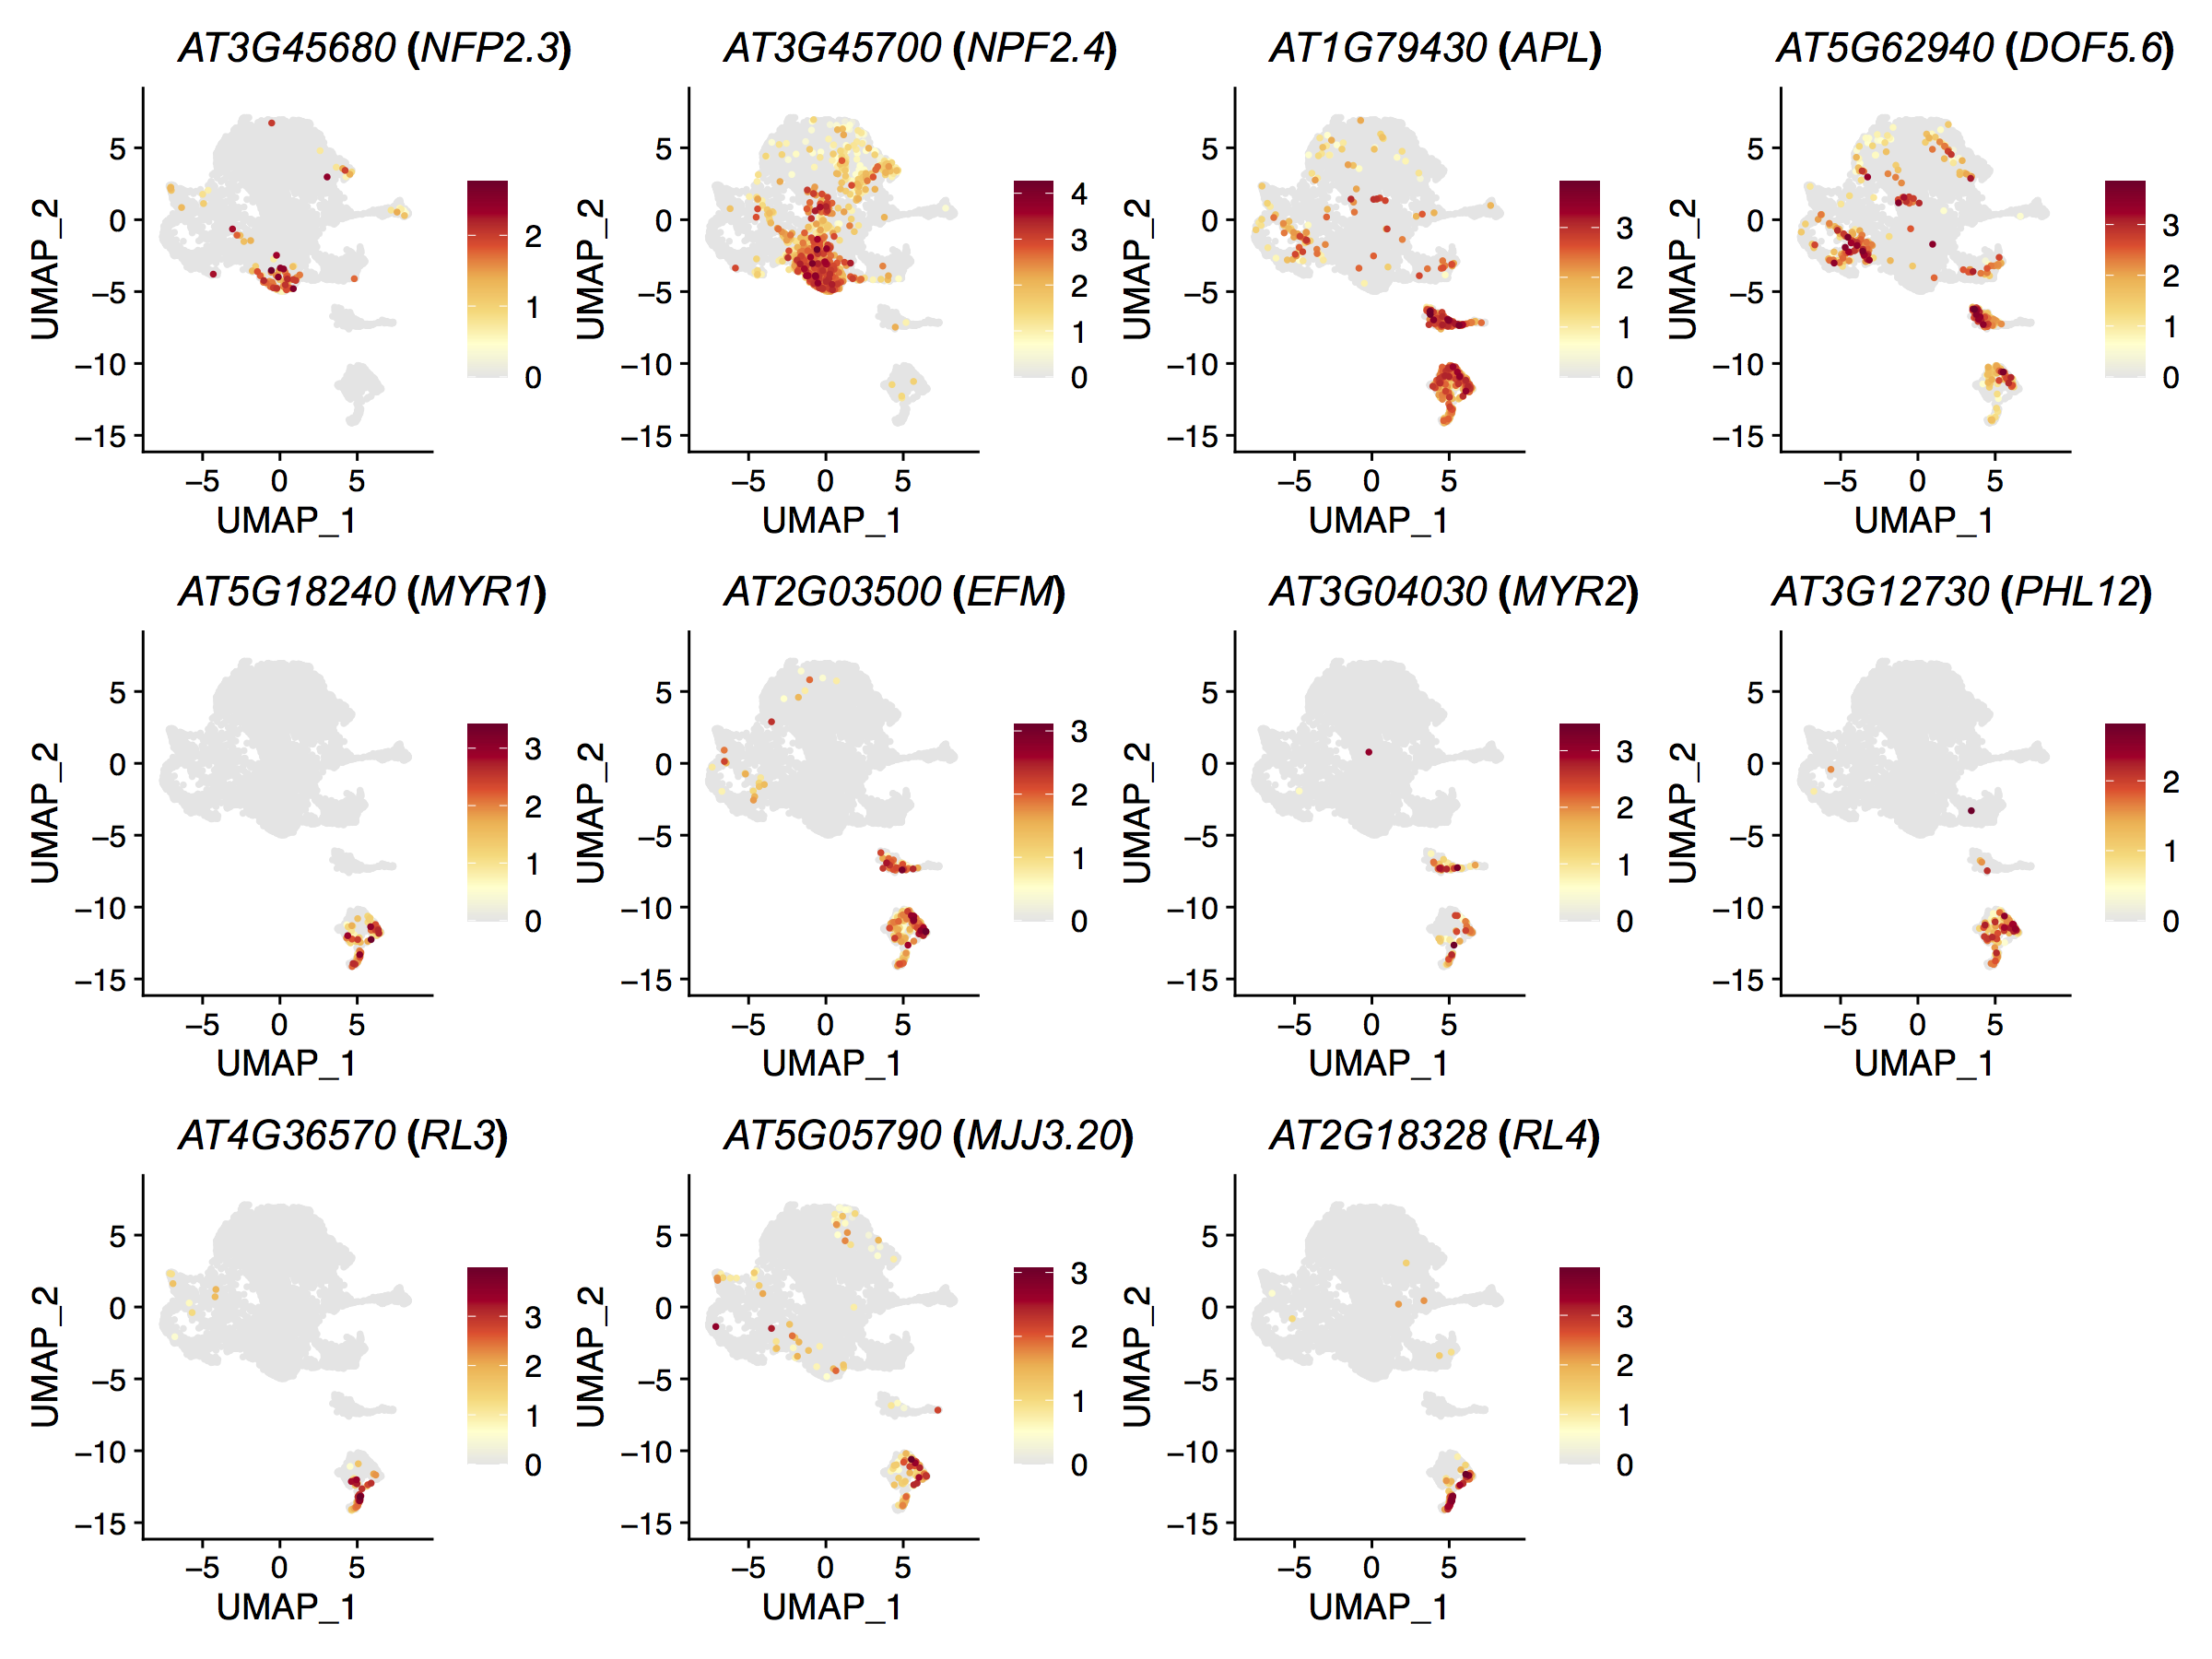


**Figure S21. Distribution of Candidate Vasculature Development Regulators in Vascular Cells.** Color: Normalized UMI counts.


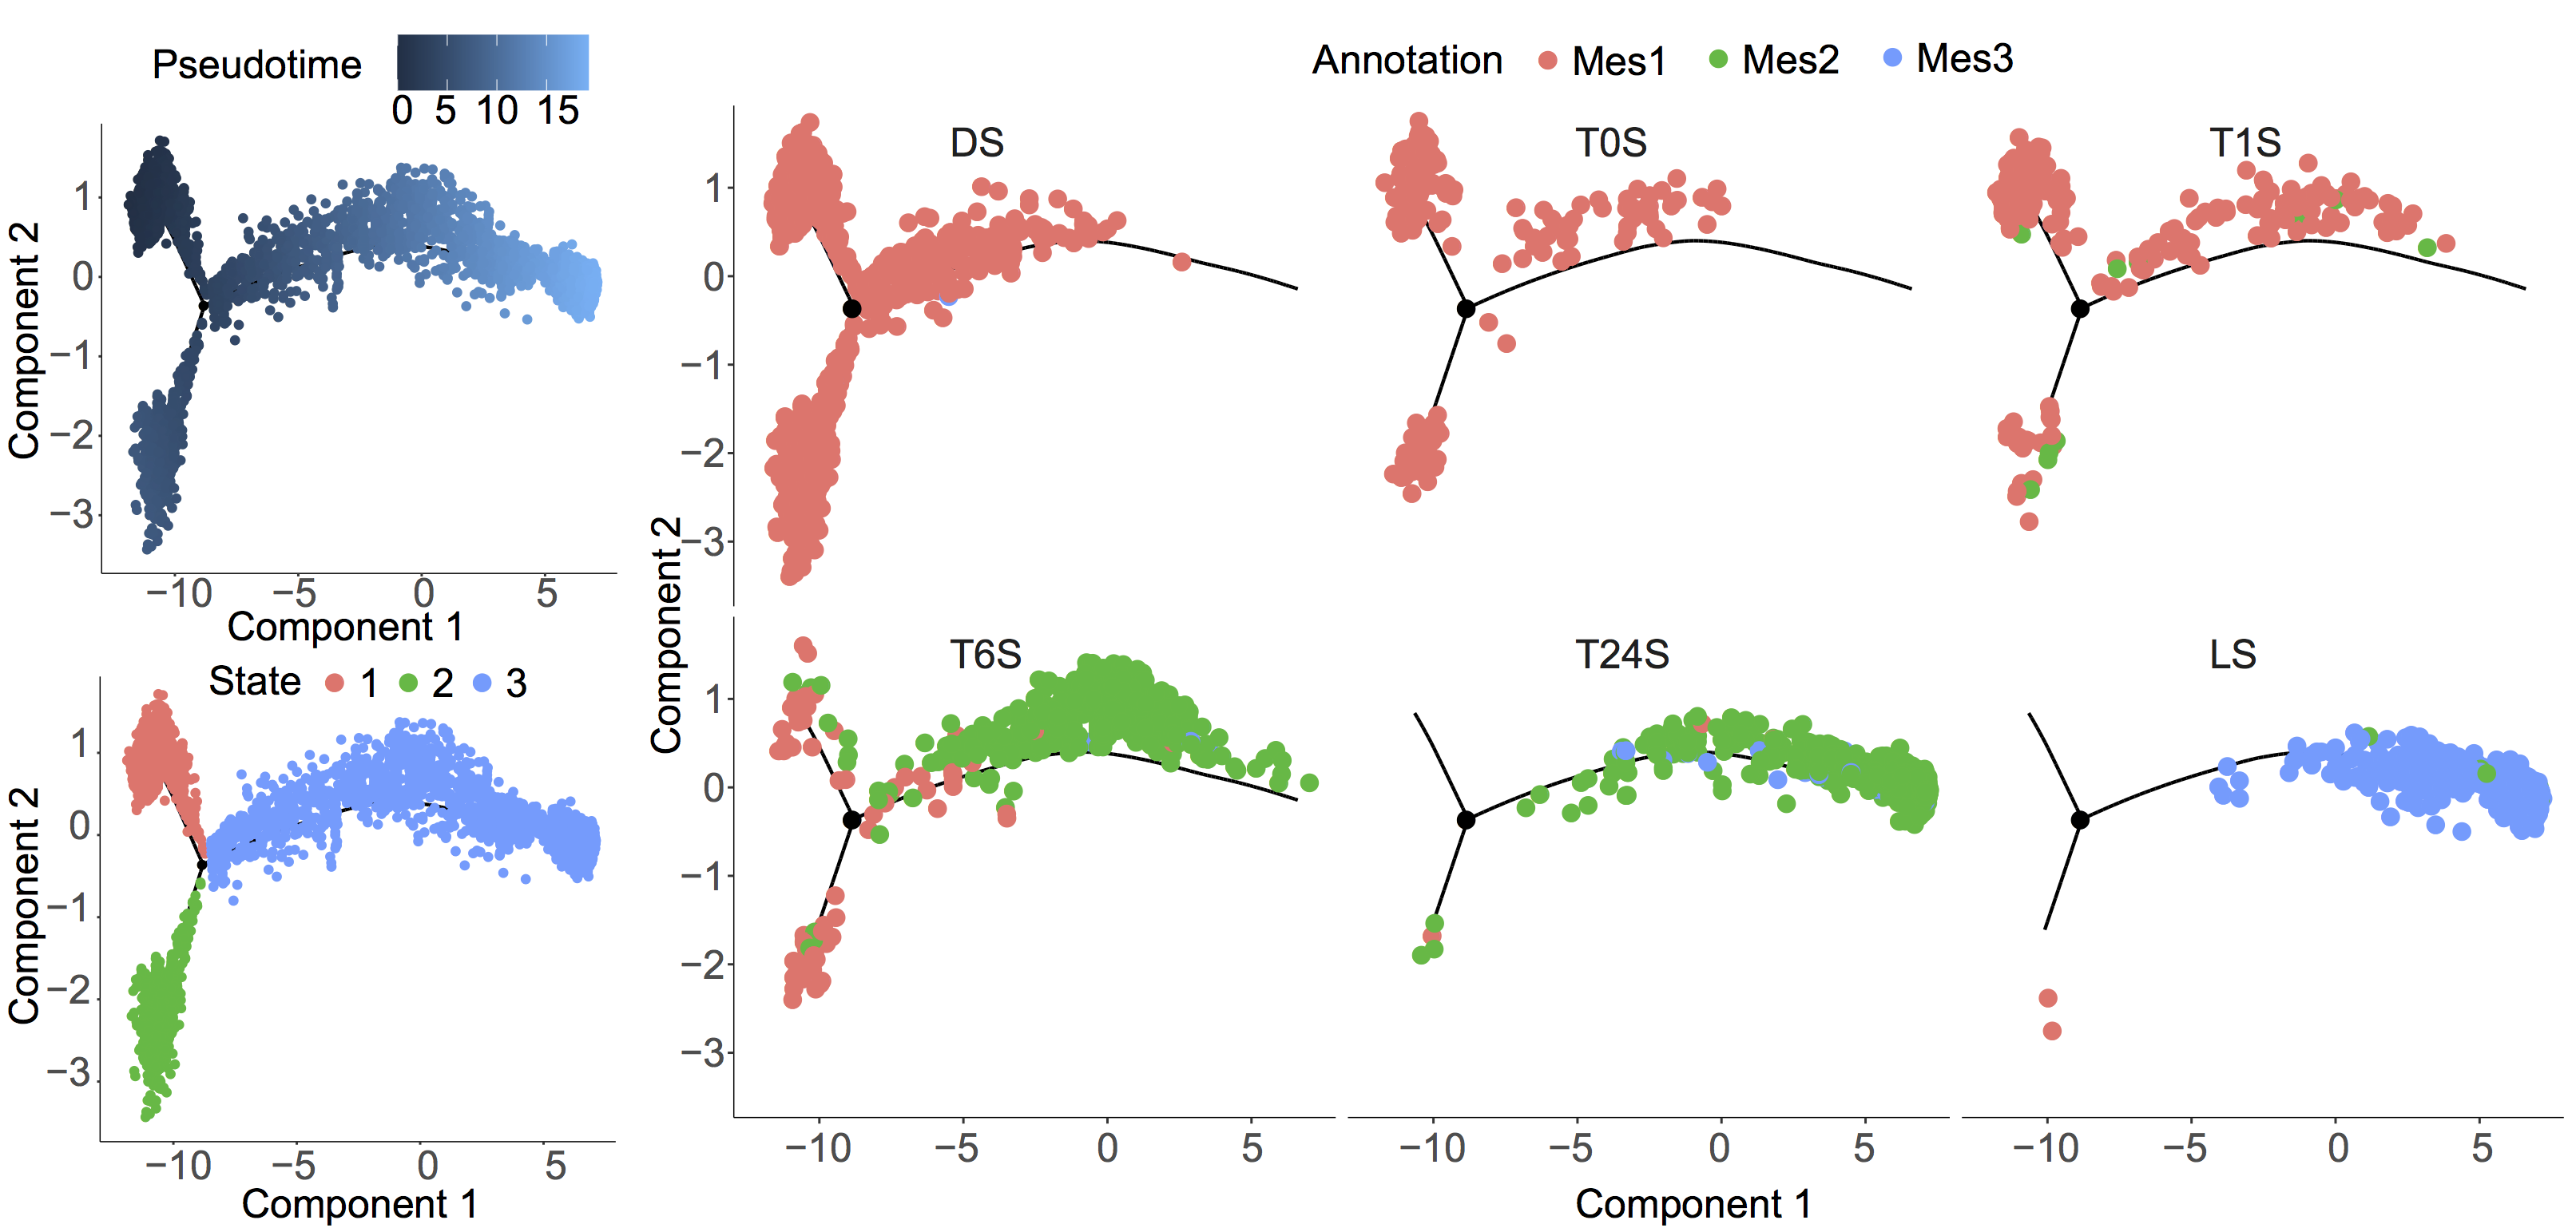


**Figure S22. The development trajectories of Mesophyll Cells during De-Etiolation.**


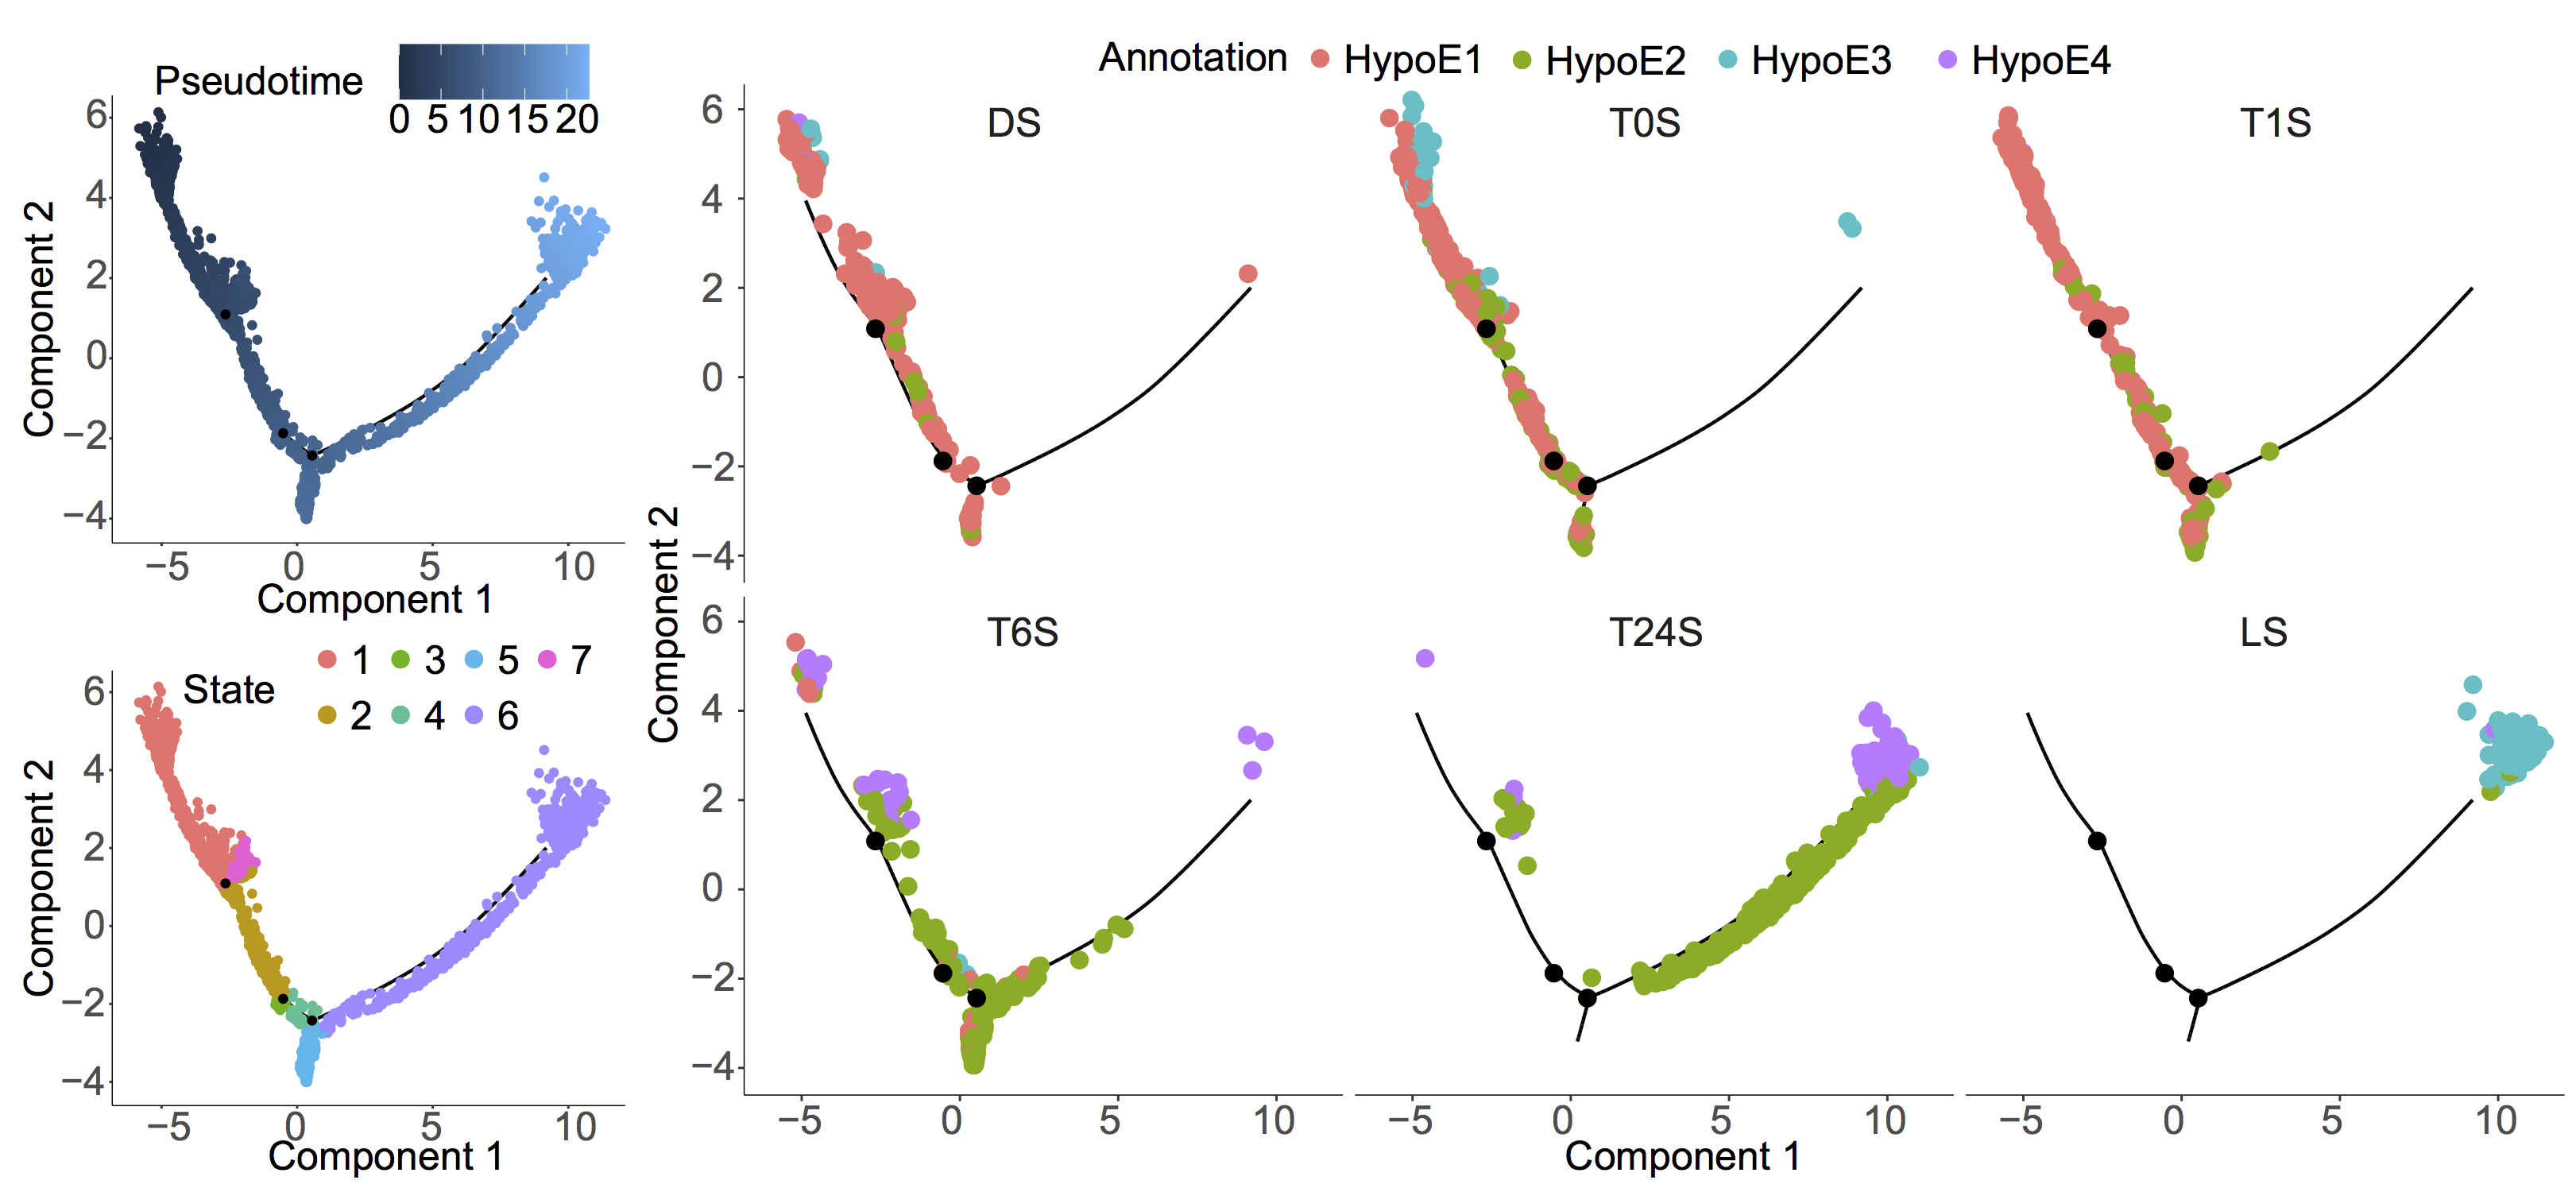


**Figure S23. The development trajectories of Hypocotyl Epidermal Cells during De-Etiolation.**


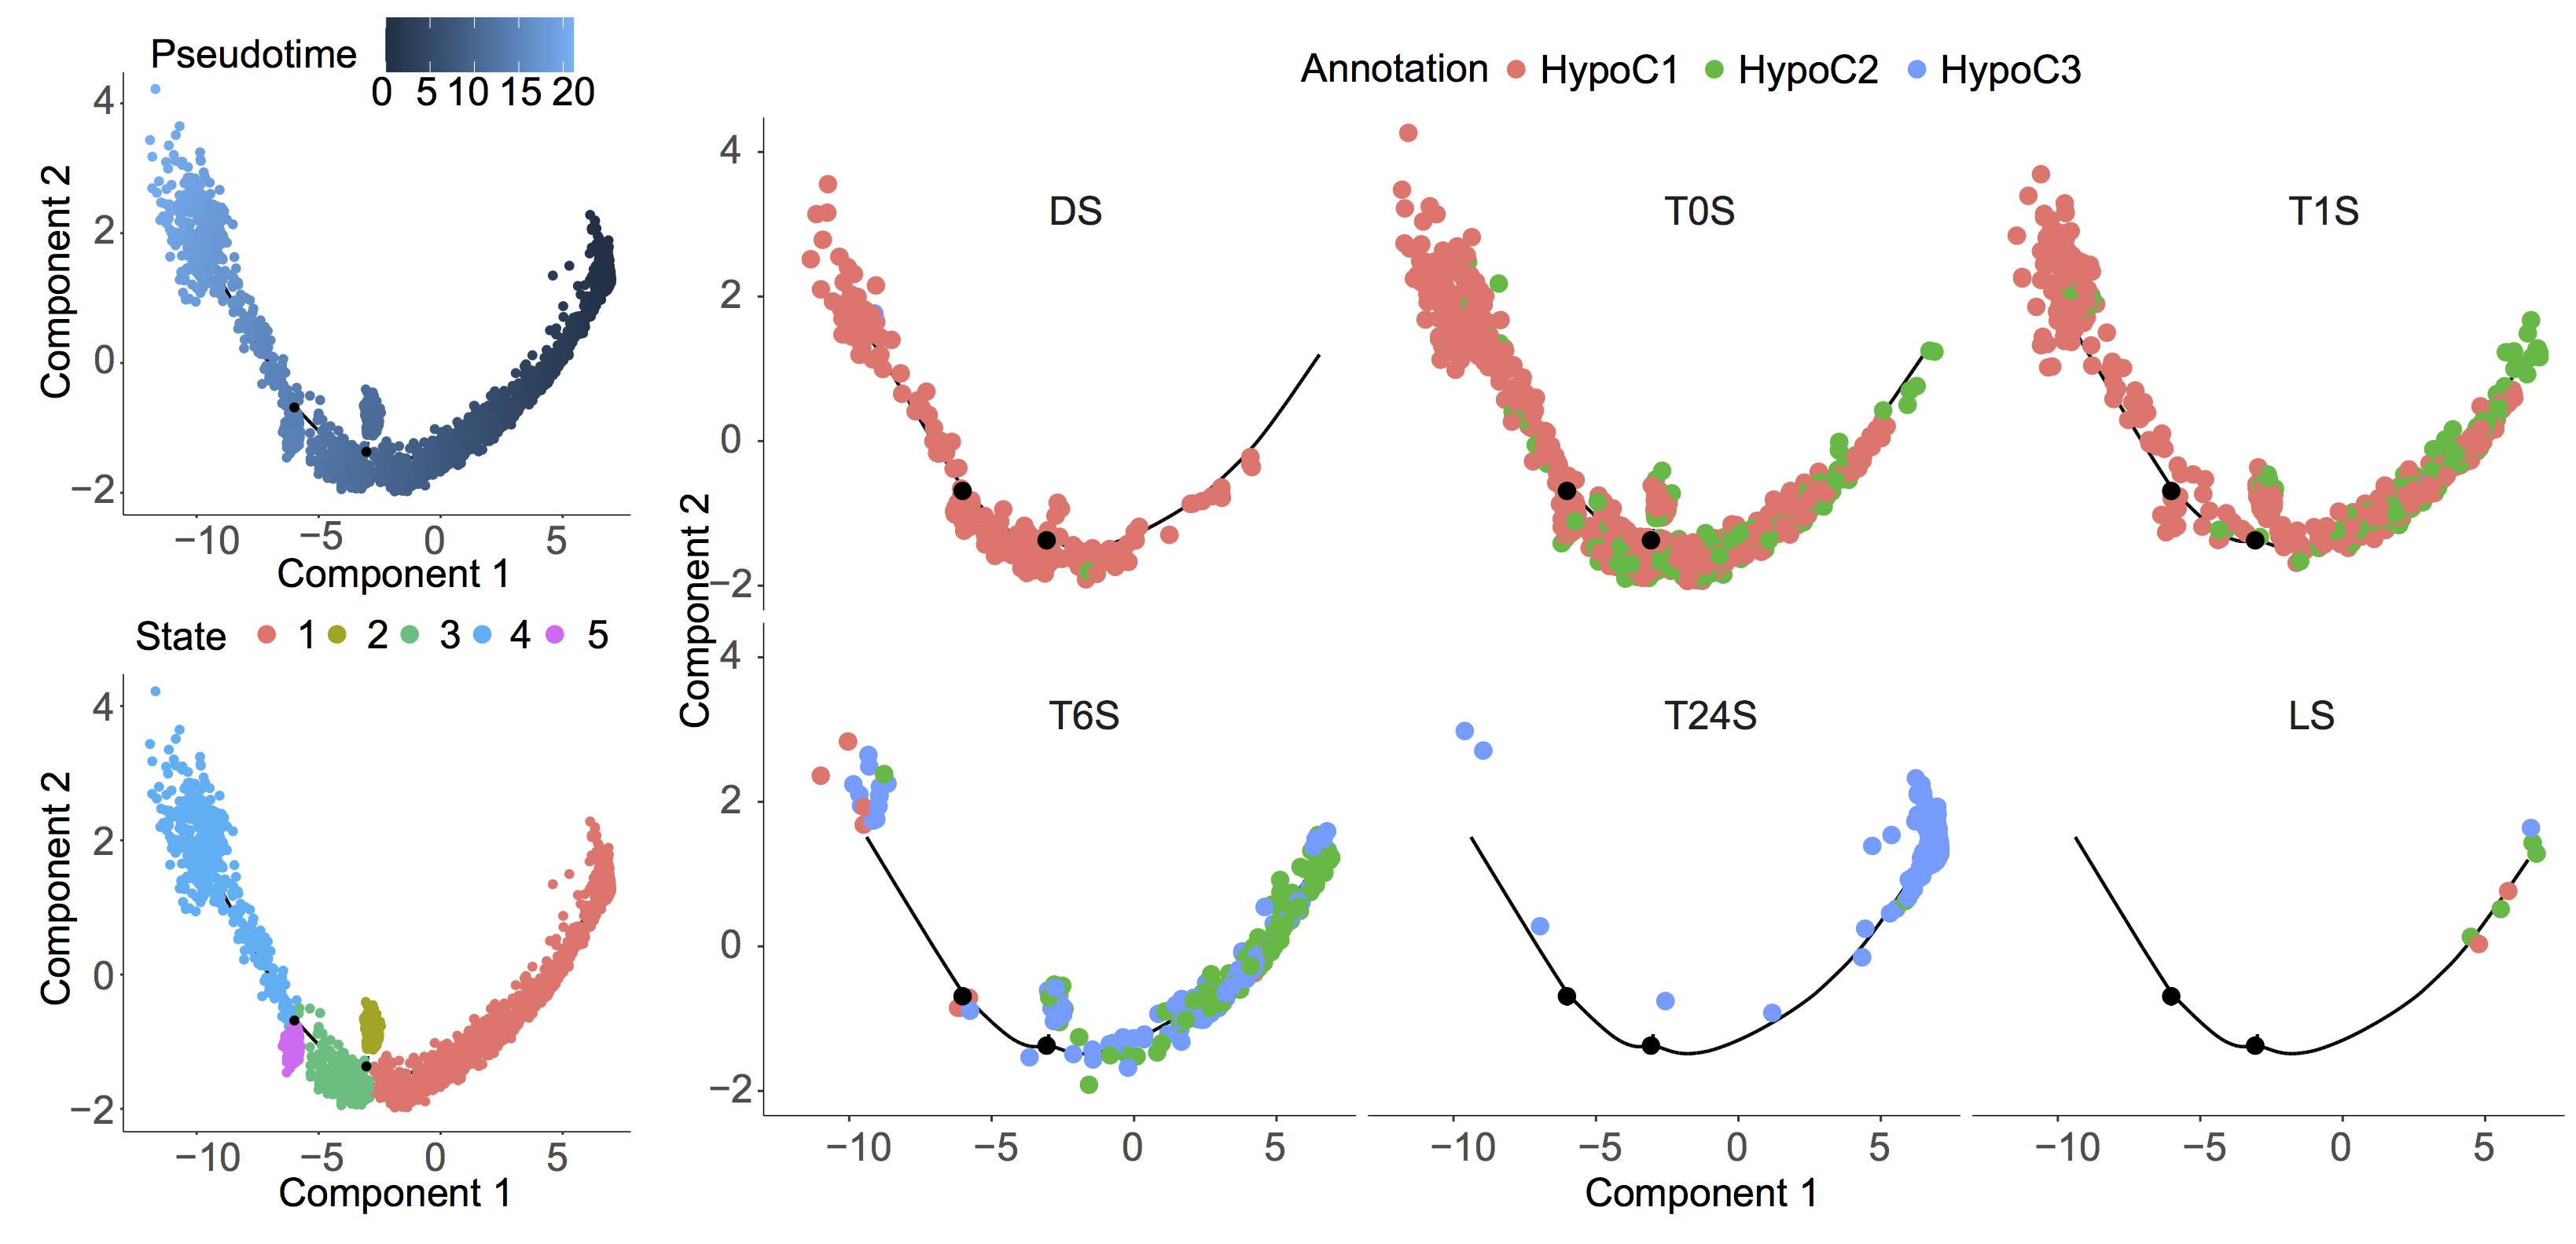


**Figure S24. The development trajectories of Cortex Cells during De-Etiolation.**


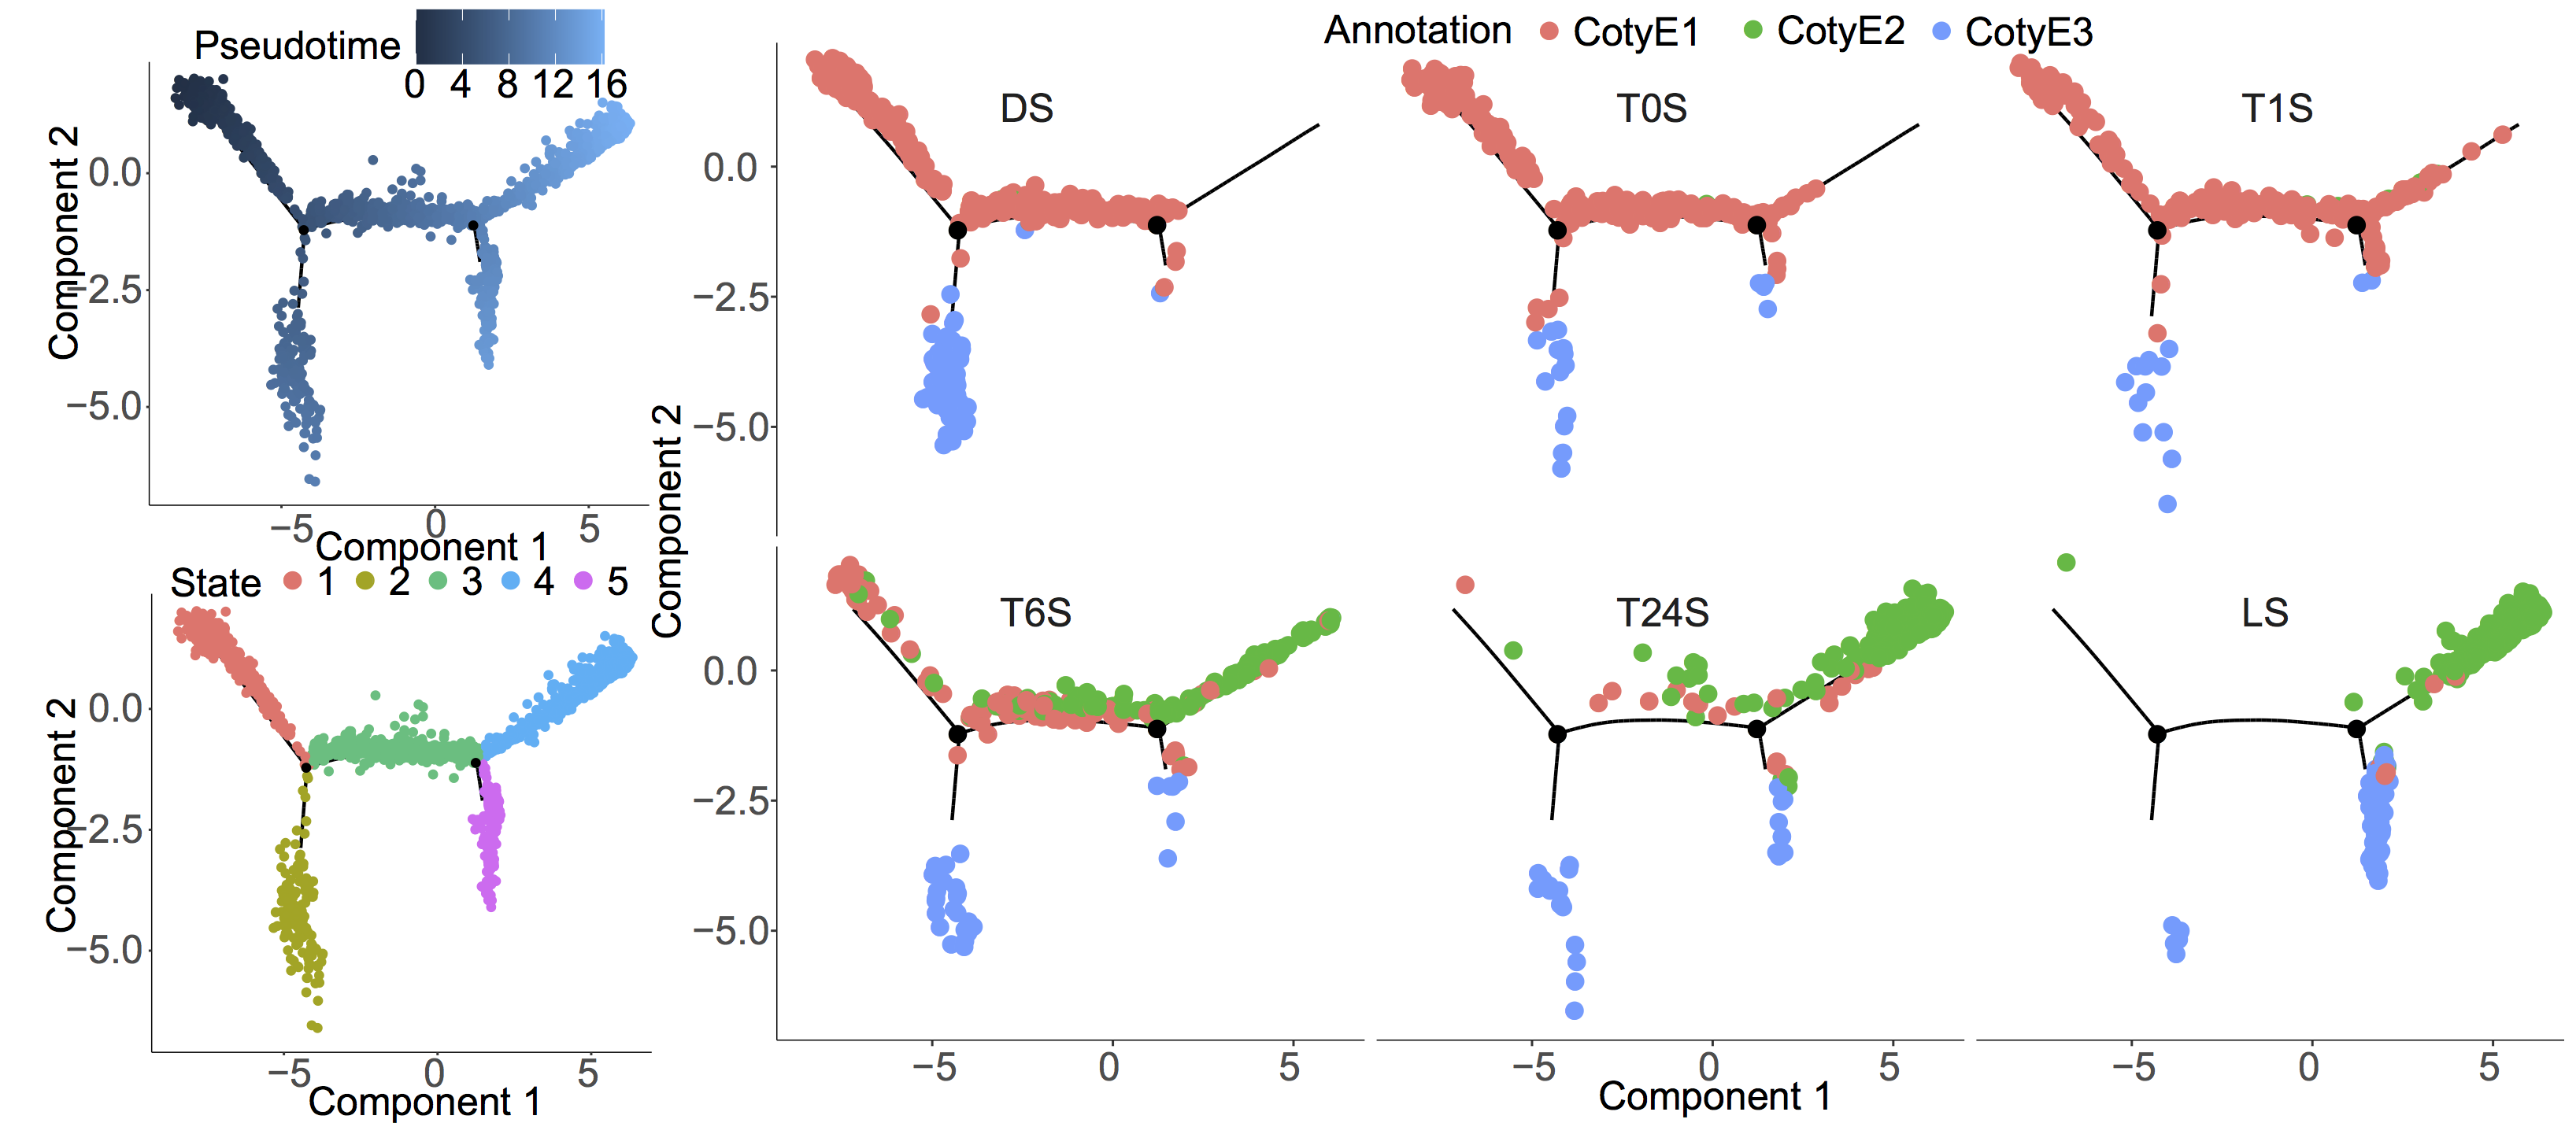


**Figure S25. The development trajectories of Cotyledon Epidermal Cells during De-Etiolation.**


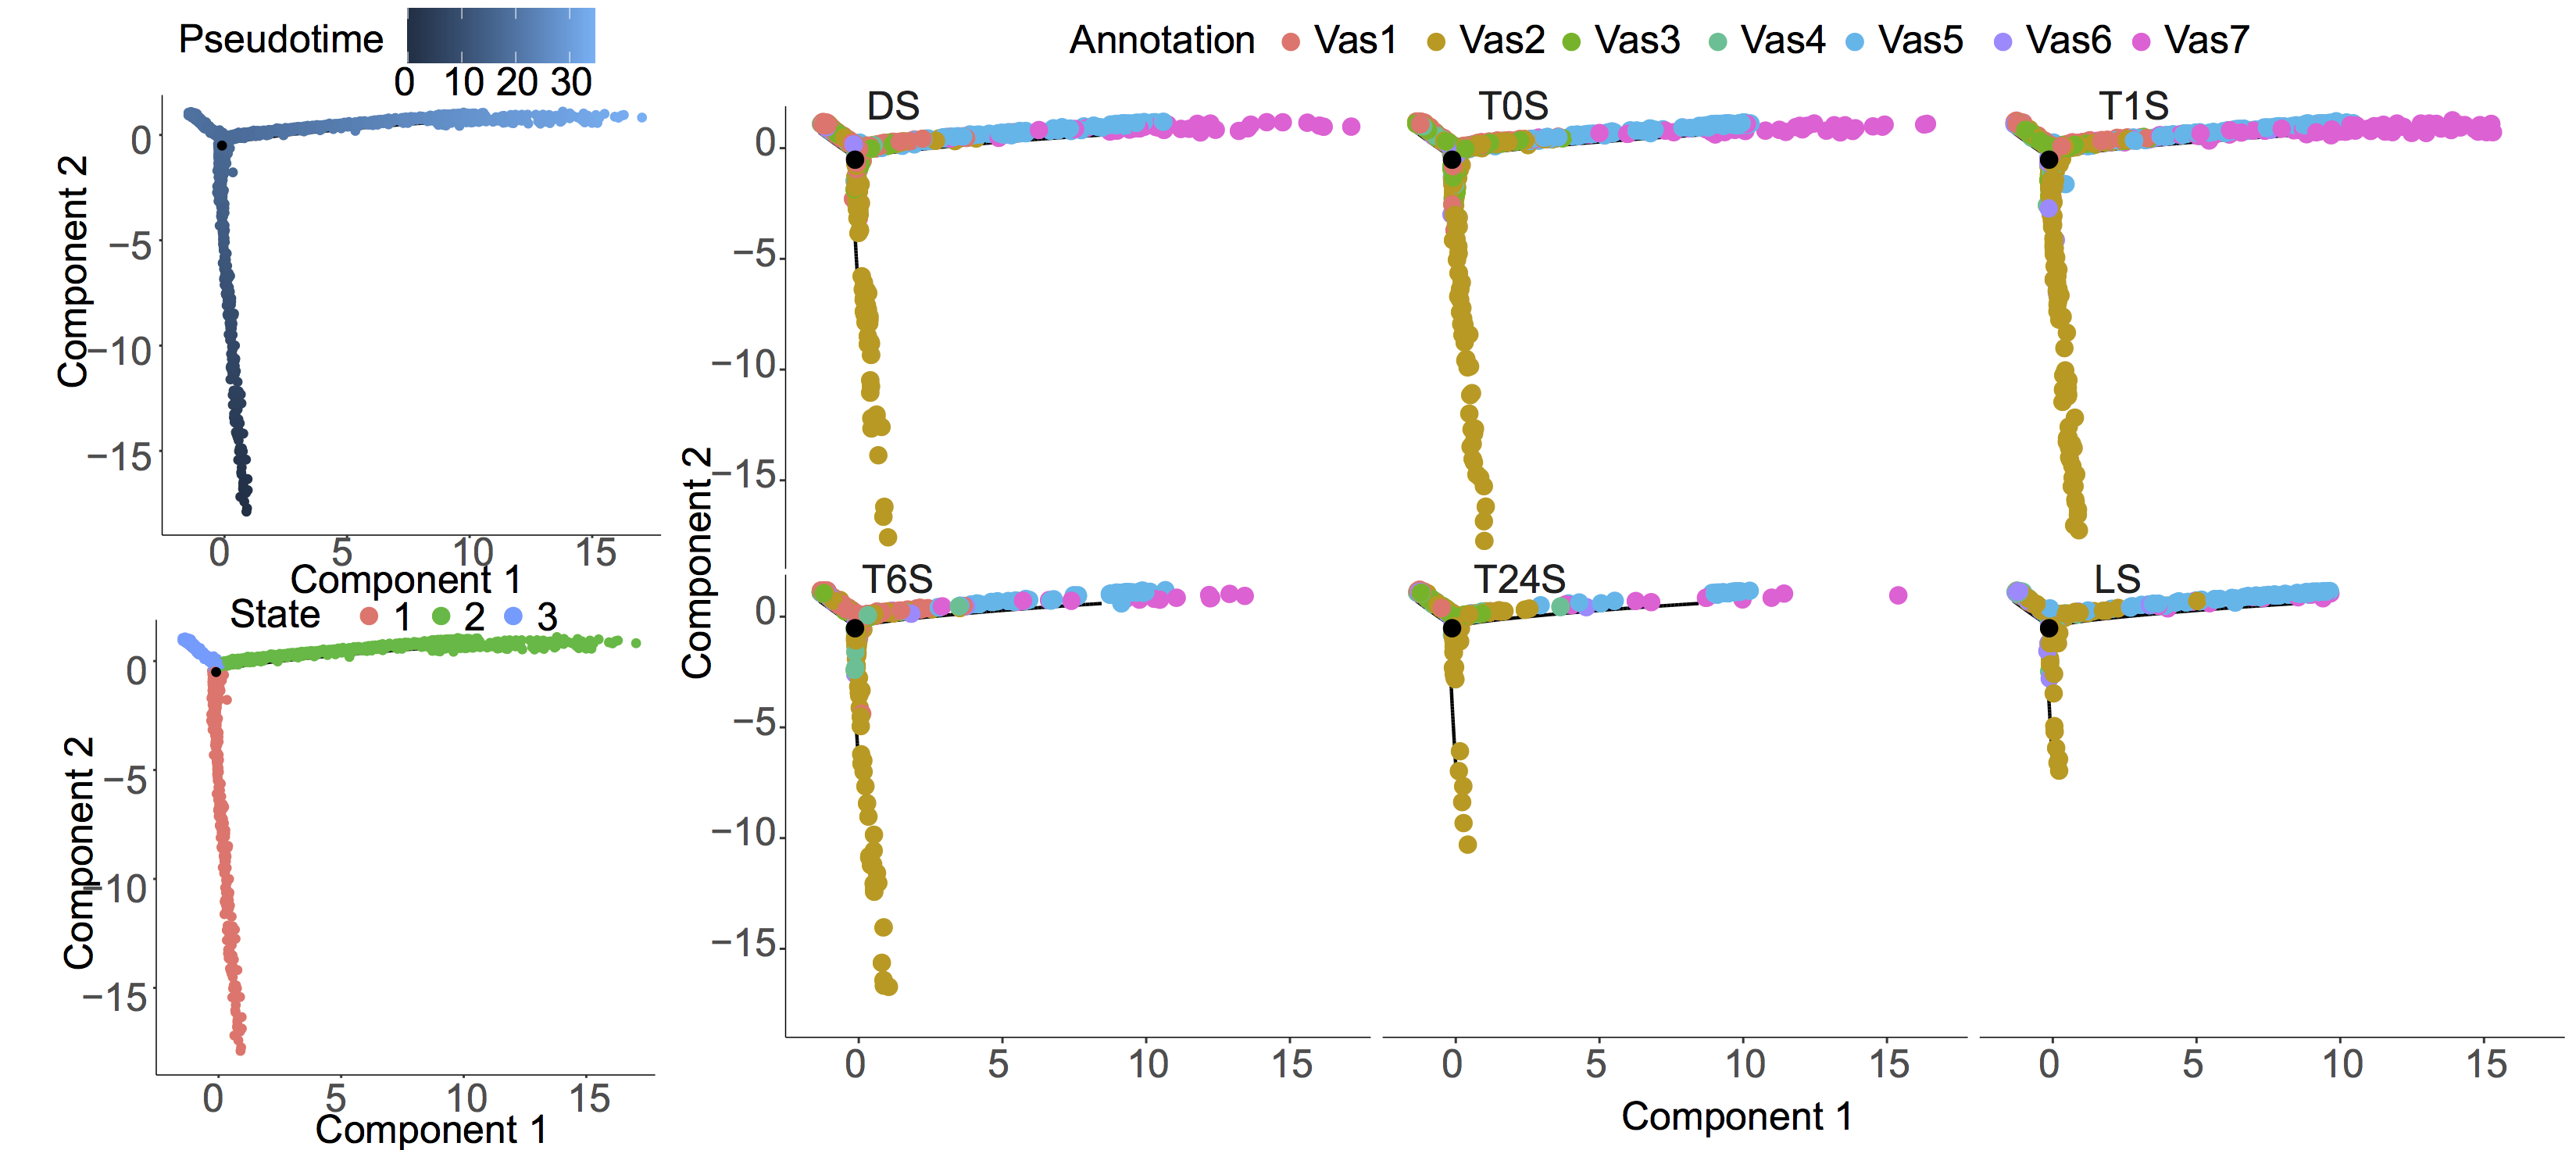


**Figure S26. The development trajectories of Vascular Cells during De-Etiolation.**


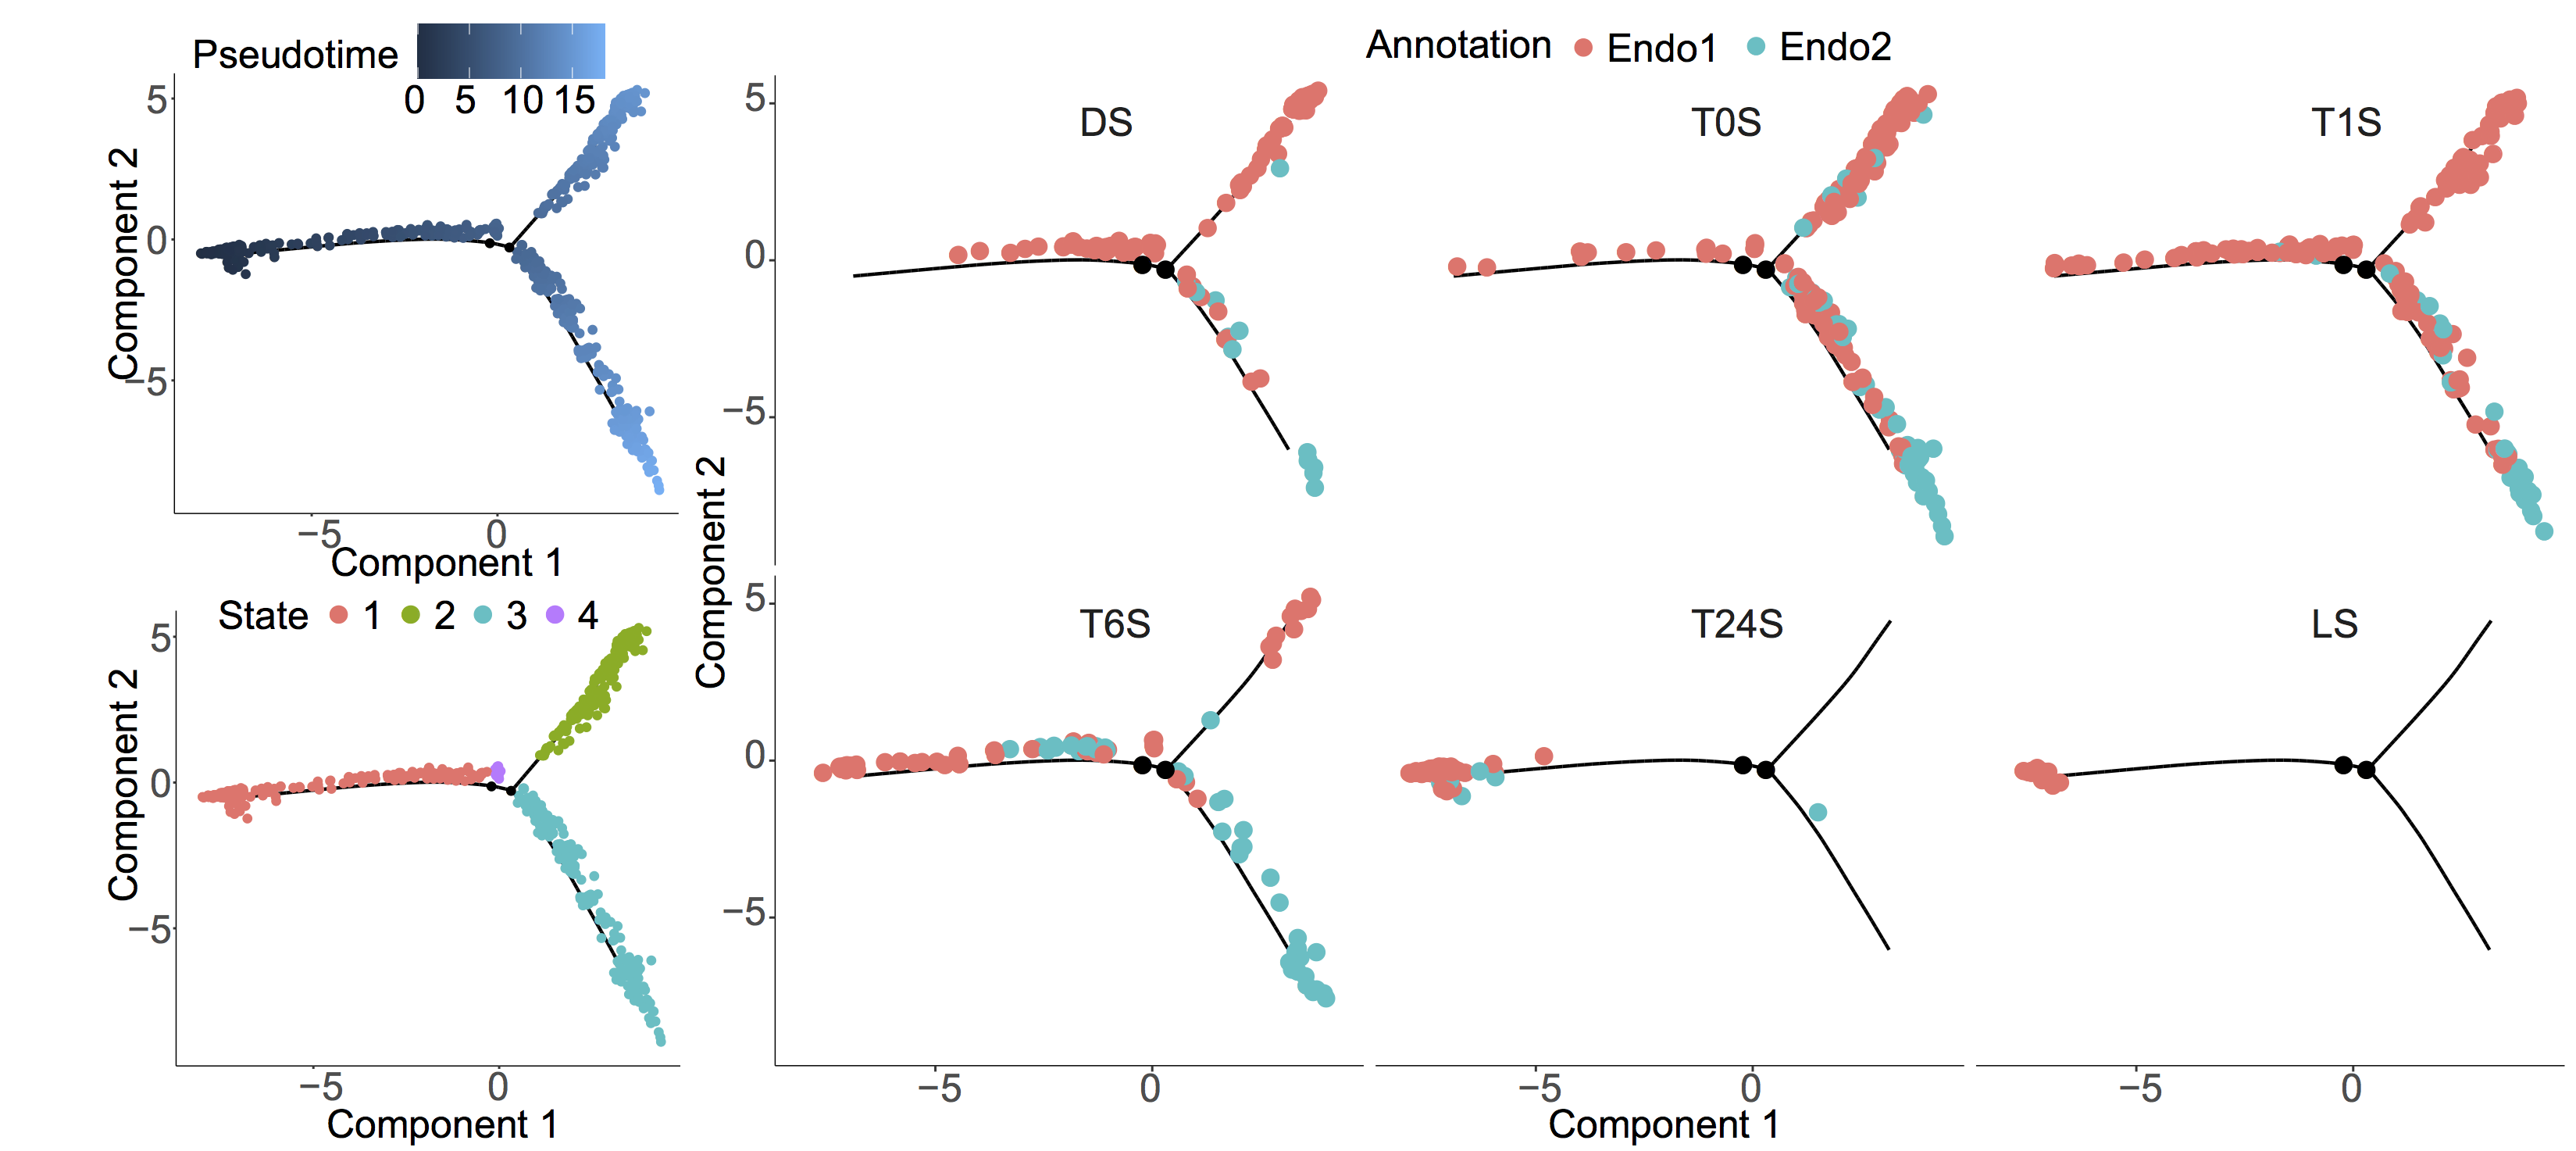


**Figure S27. The development trajectories of Endodermis Cells during De-Etiolation.**


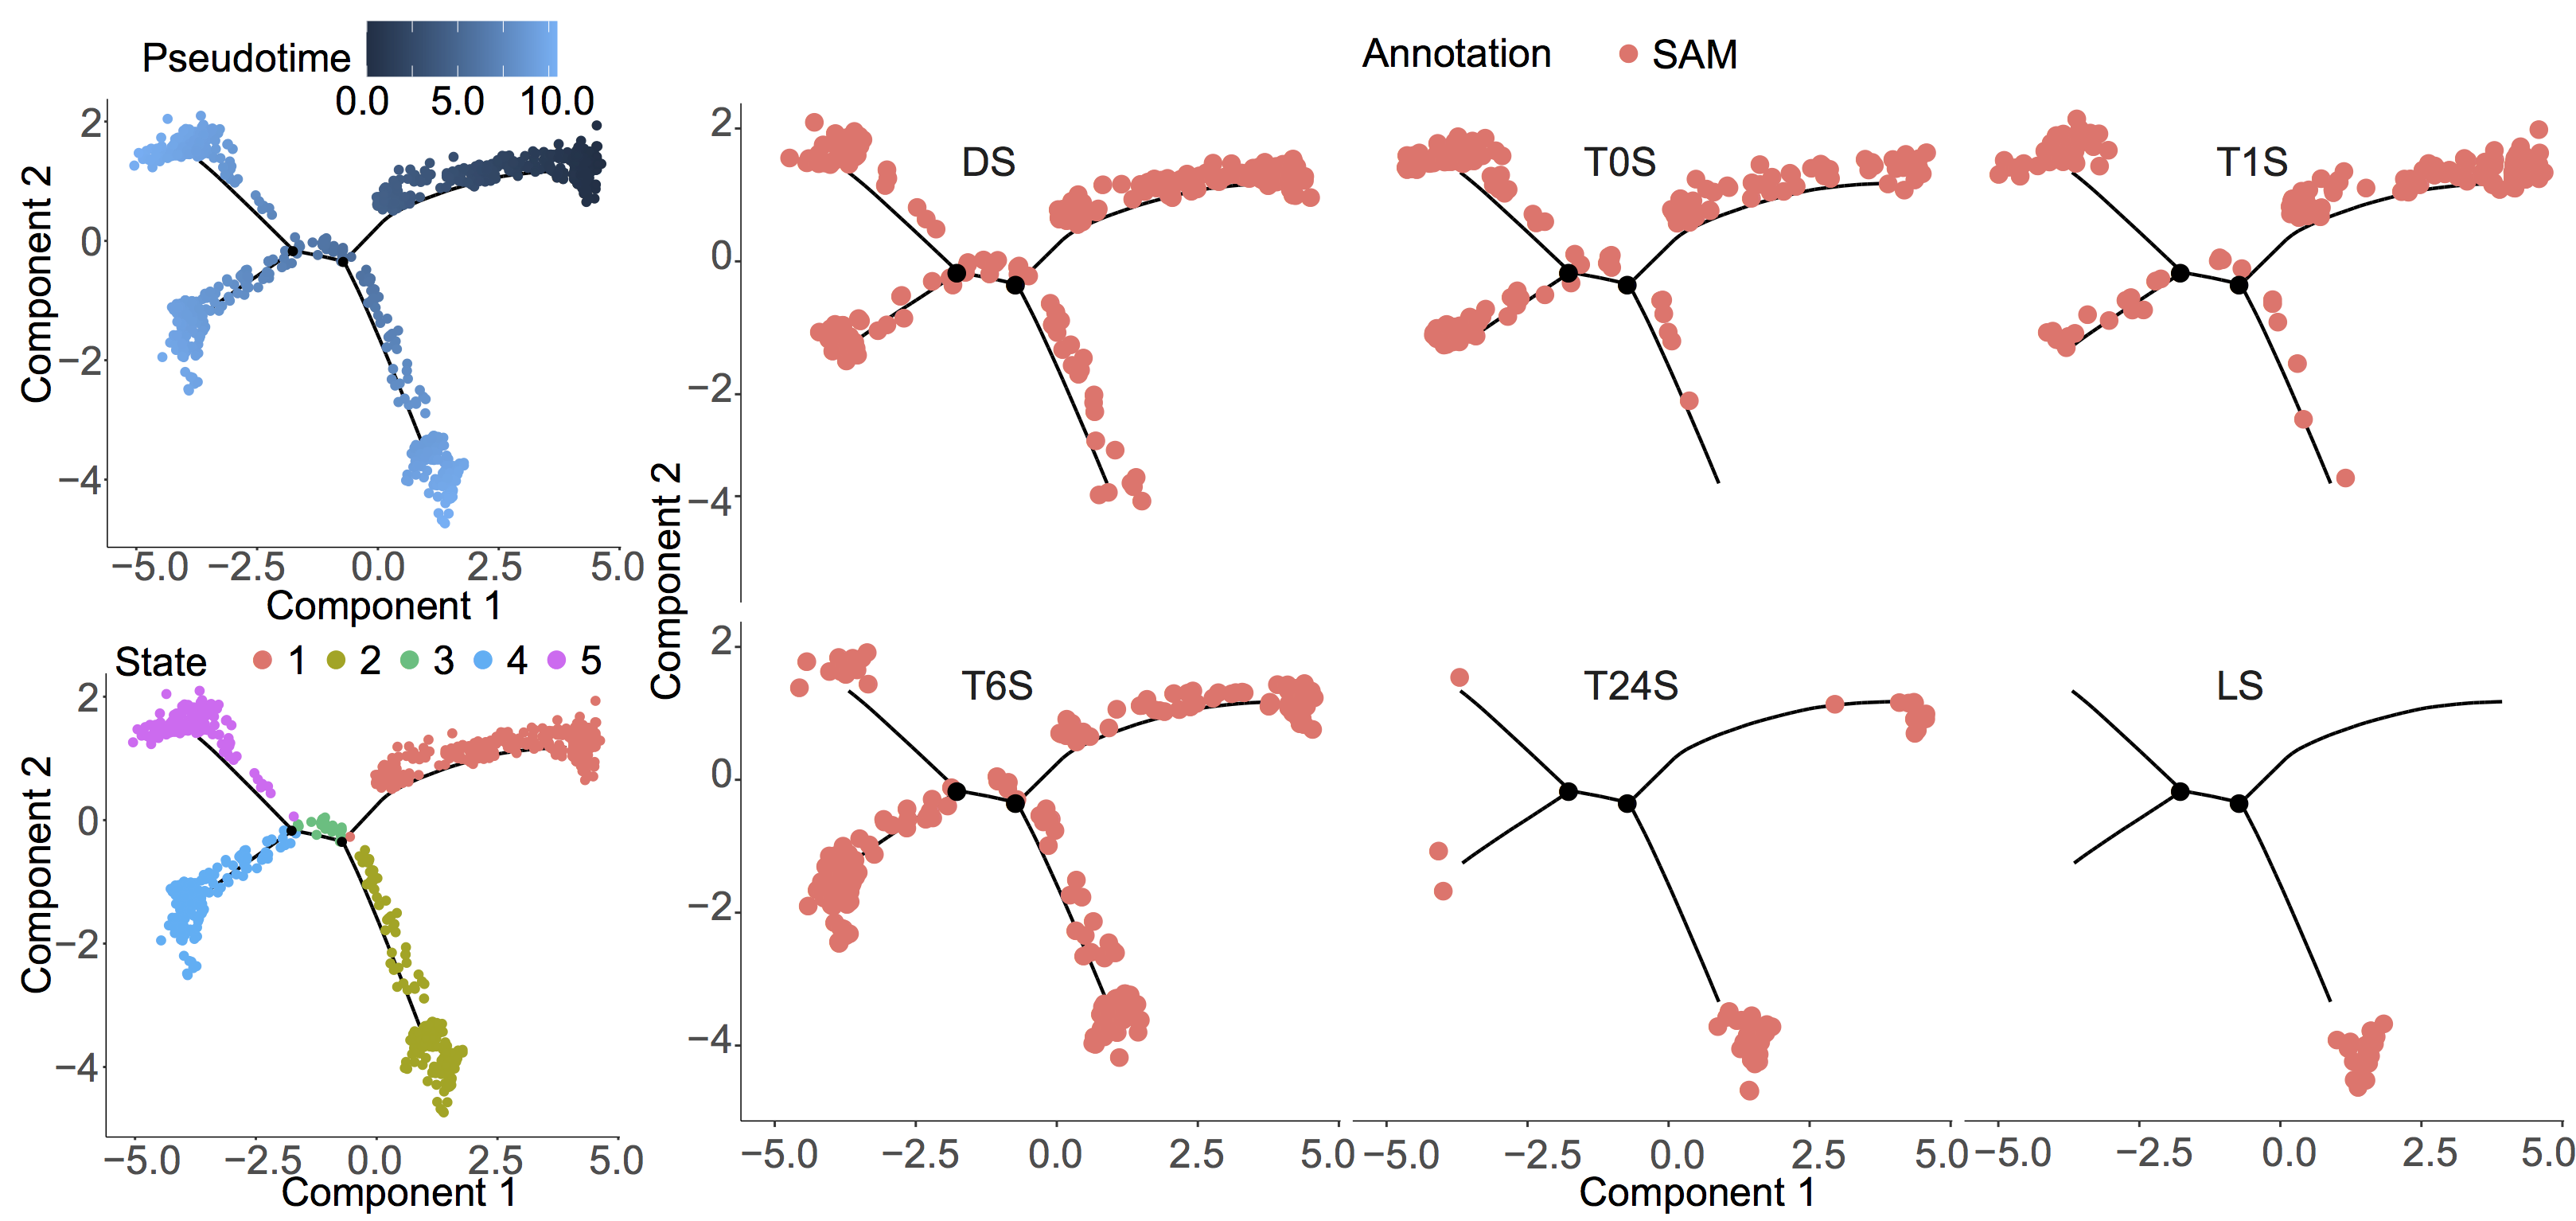


**Figure S28. The development trajectories of SAM Cells during De-Etiolation.**


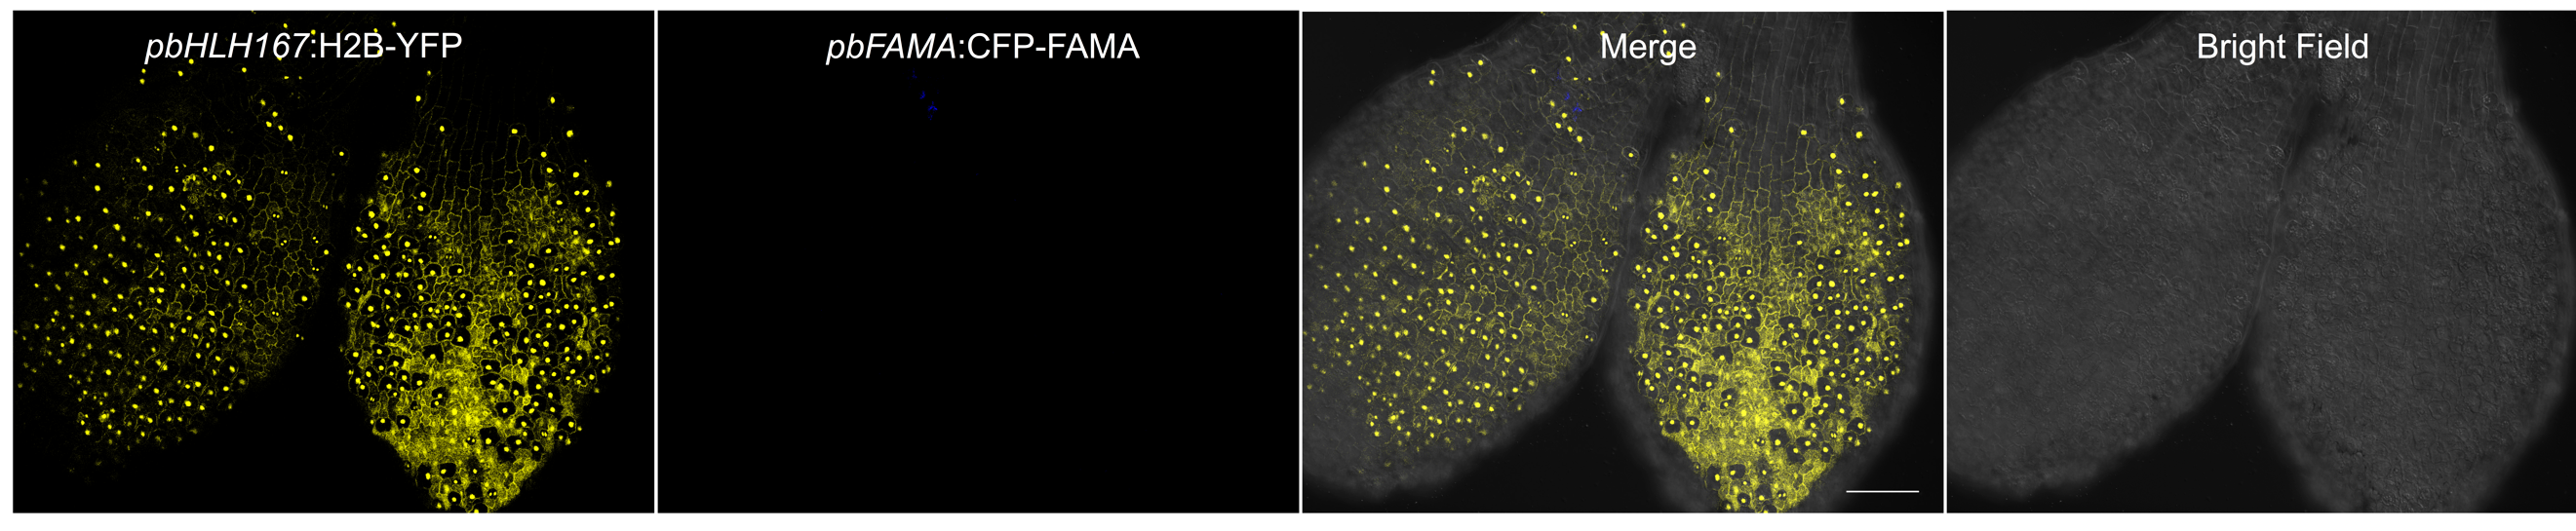


**Figure S29. Expression of *bHLH167* in Epidermis for Seedlings Grown in Constant Dark 3-4 Days.** The gene expression pattern of *bHLH167* and *FAMA* was revealed by promoter Histone2B-YFP (H2B-YFP, yellow) and CFP-FAMA (blue) reporter. Scale bar: 100 μm.


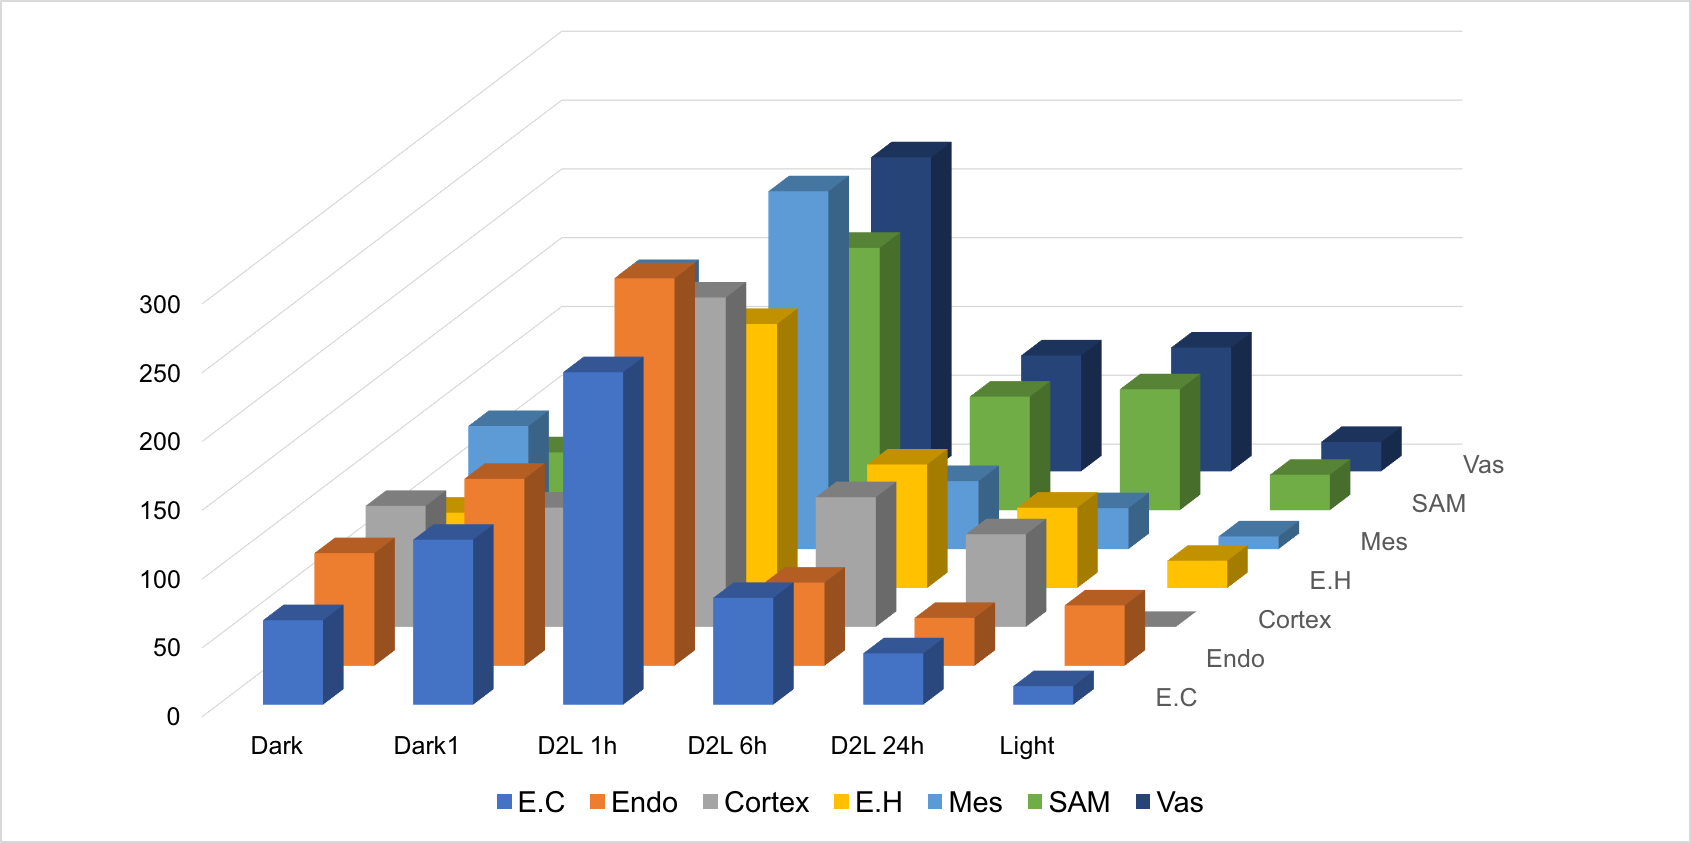


**Figure S30. Relative Expression (Mean of Normalized UMI Counts for Each Cell) of *HY5* during deetiolation in each cell type.**
